# Supplementary material
Source: PubMed Central journal article supplement (PMC3193075)
Supplement: NIHMS327430-supplement-Supplementary_Data.pdf [file NIHMS327430-supplement-Supplementary_Data.pdf]

# SF1

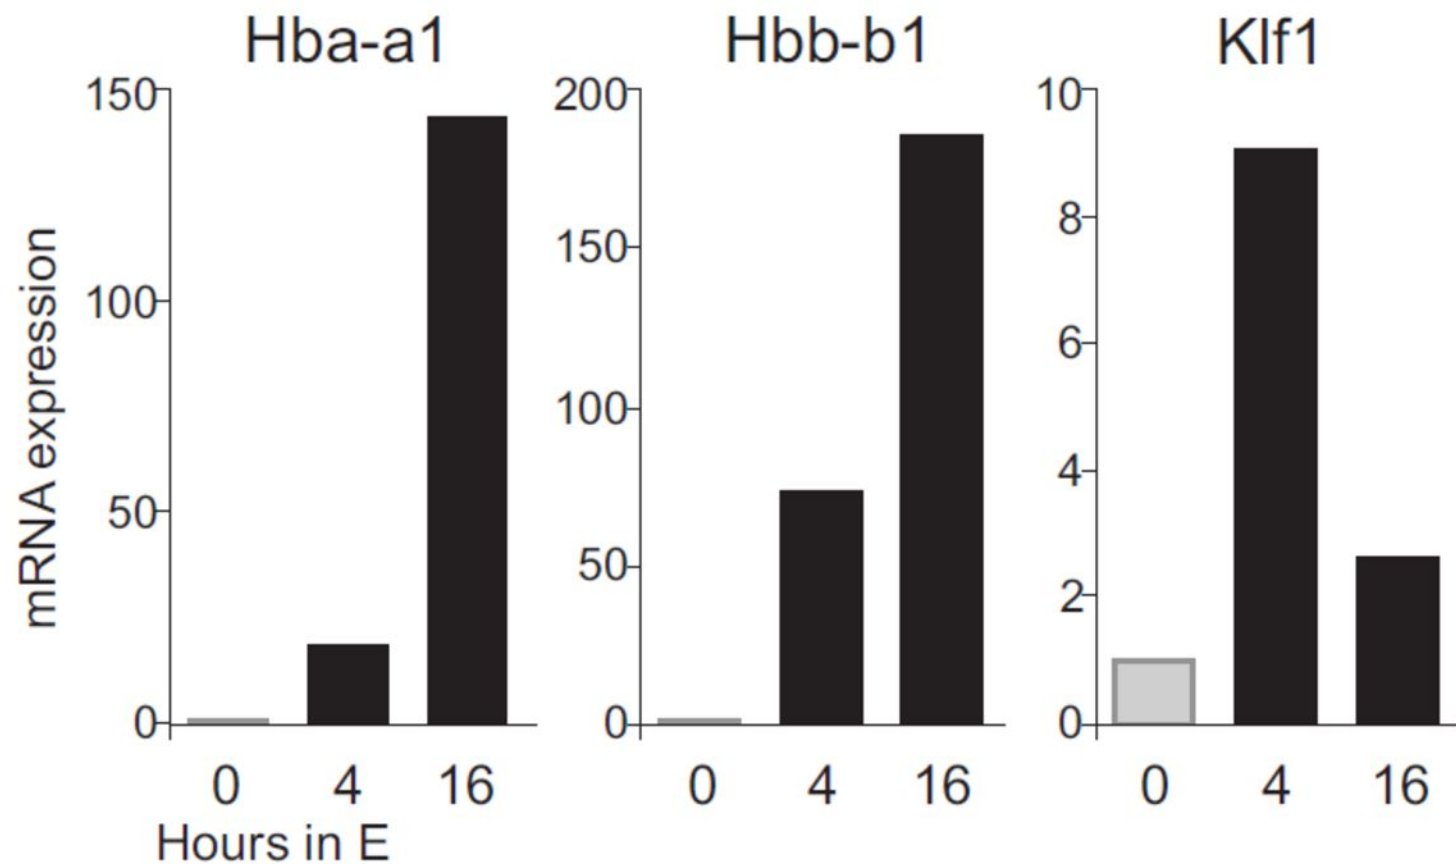

SF2

→ Proerythroblasts    → Basophilic erythroblasts    ↗ Atypical

MEL

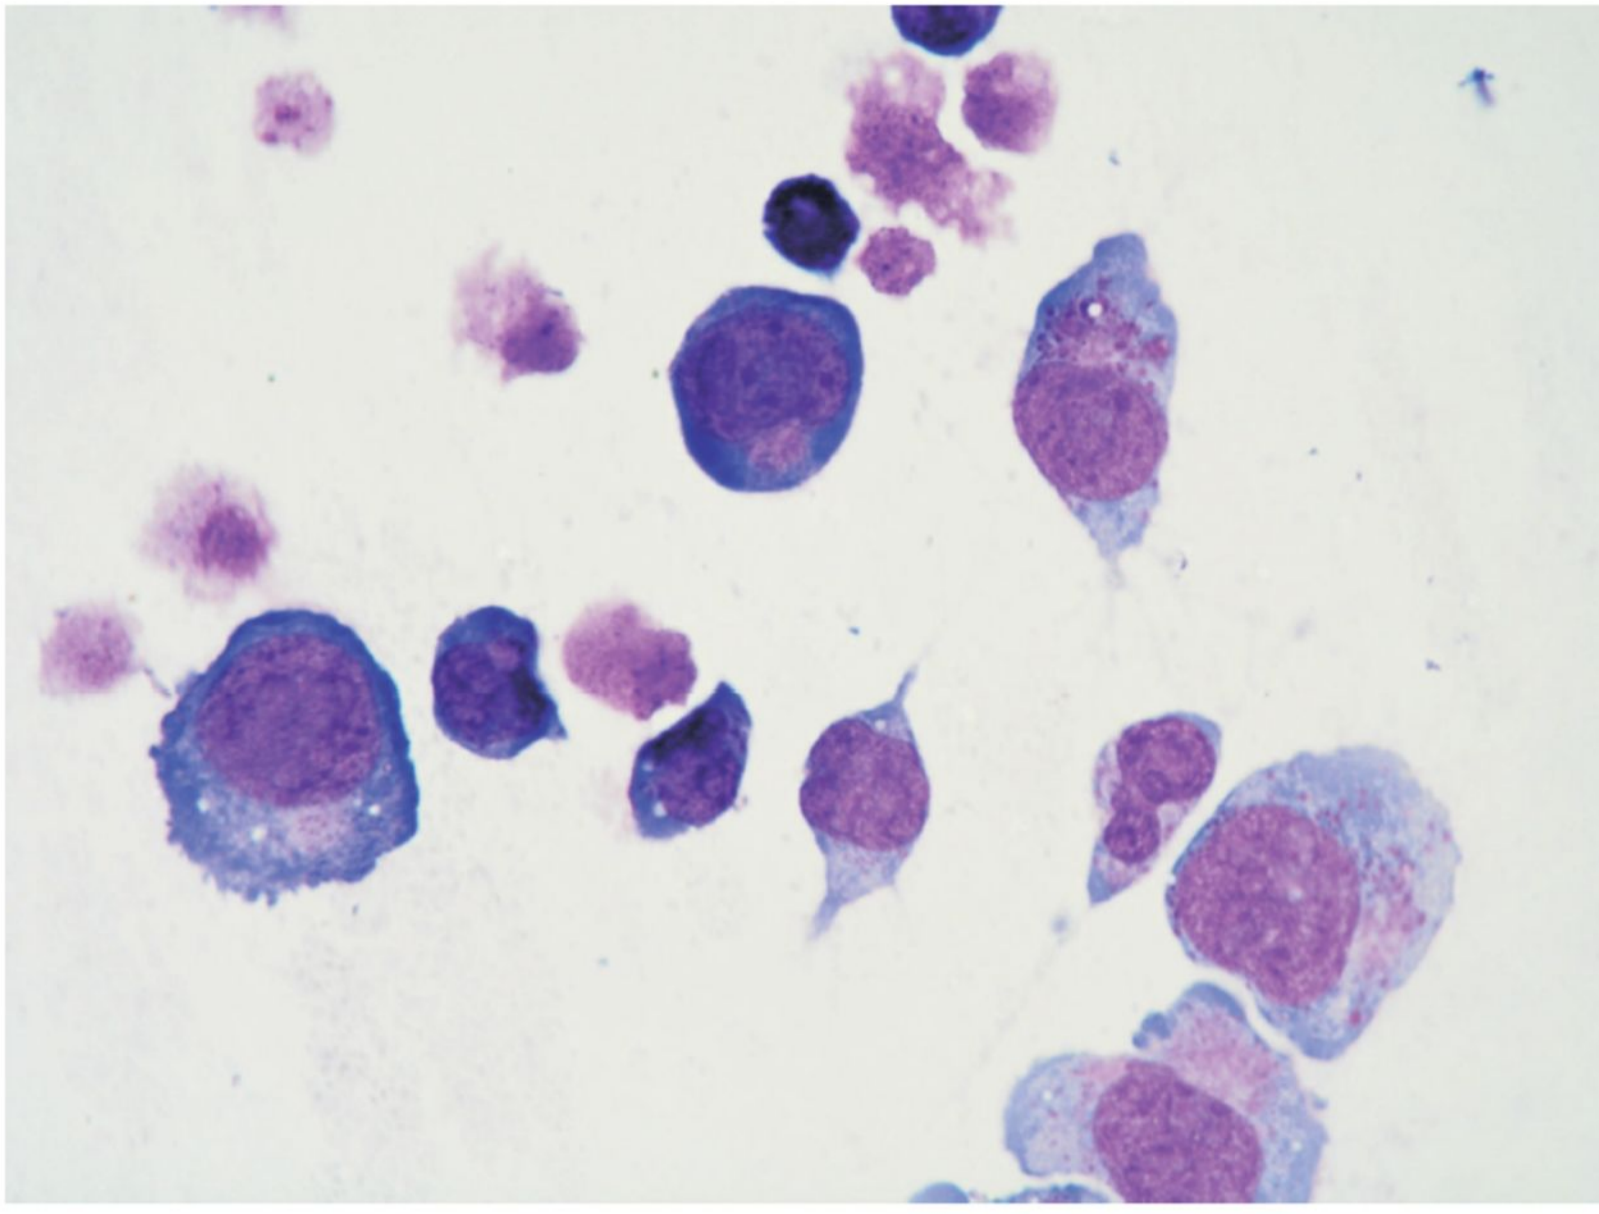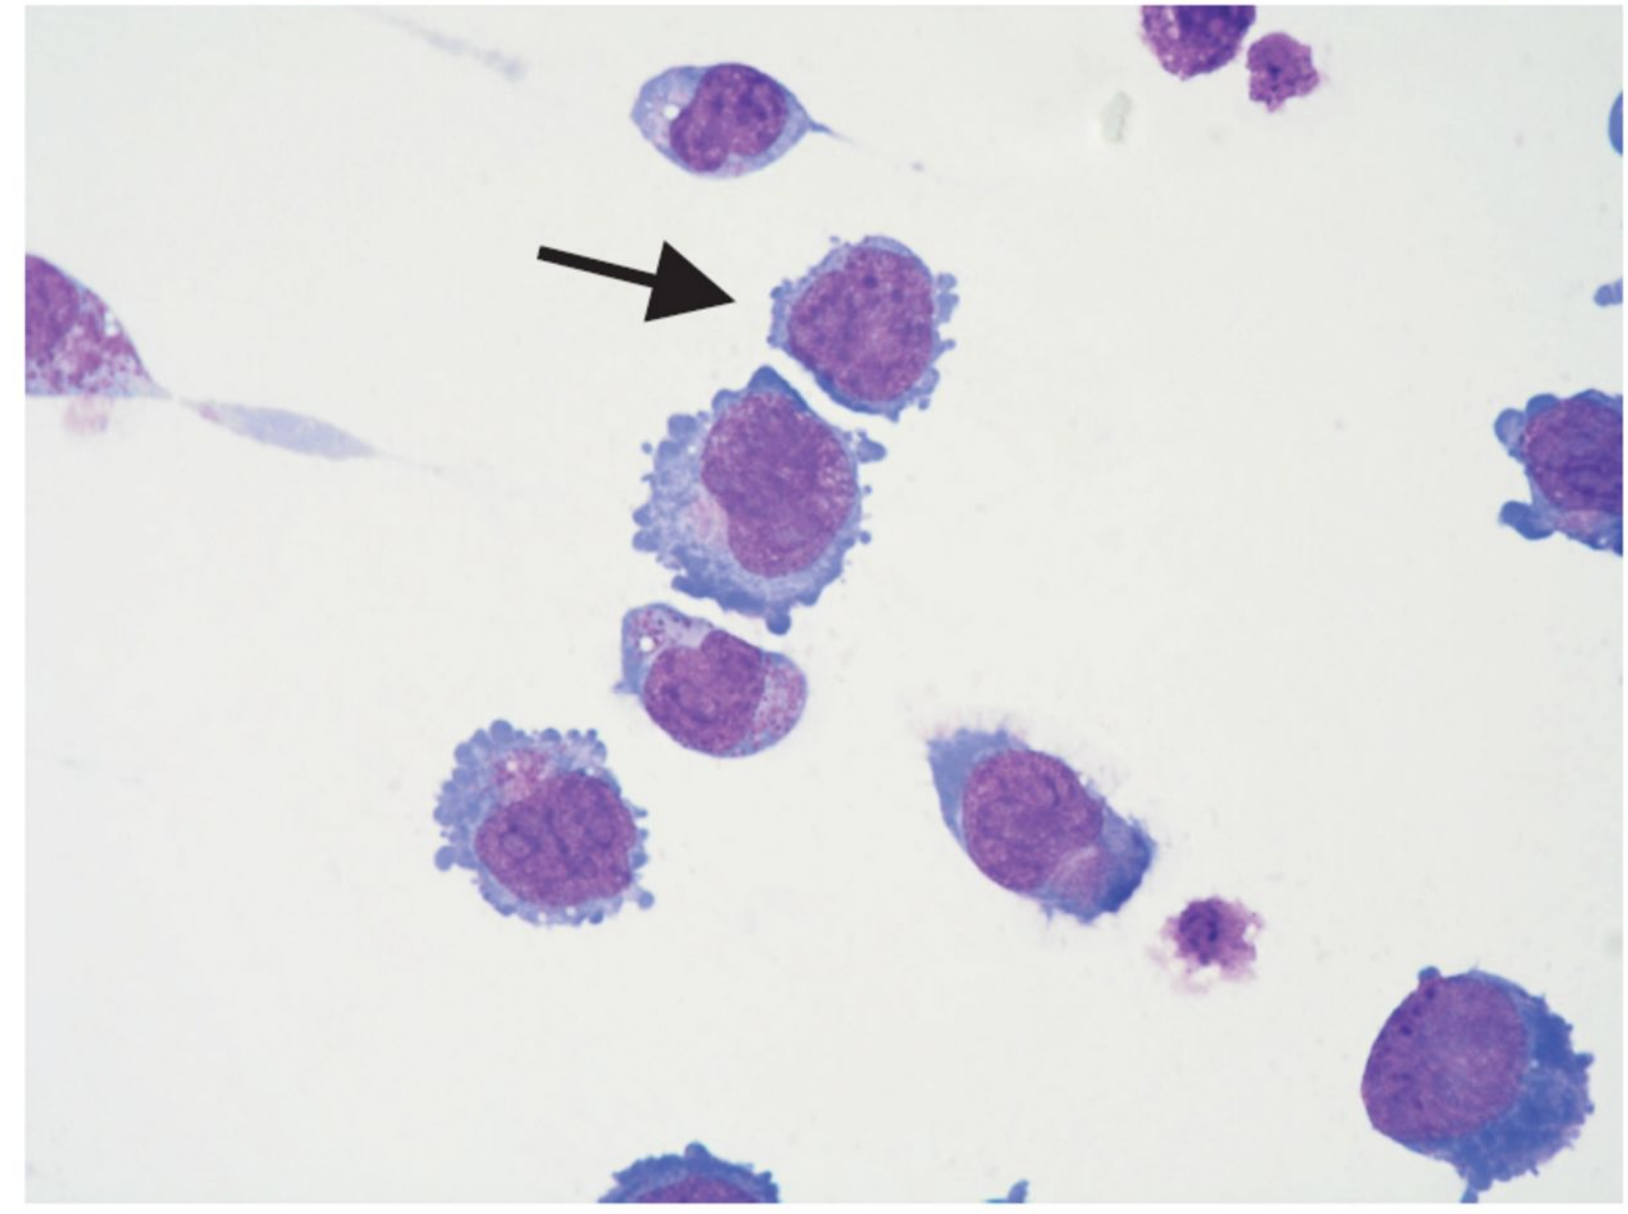

MEL<sup>PUER</sup>

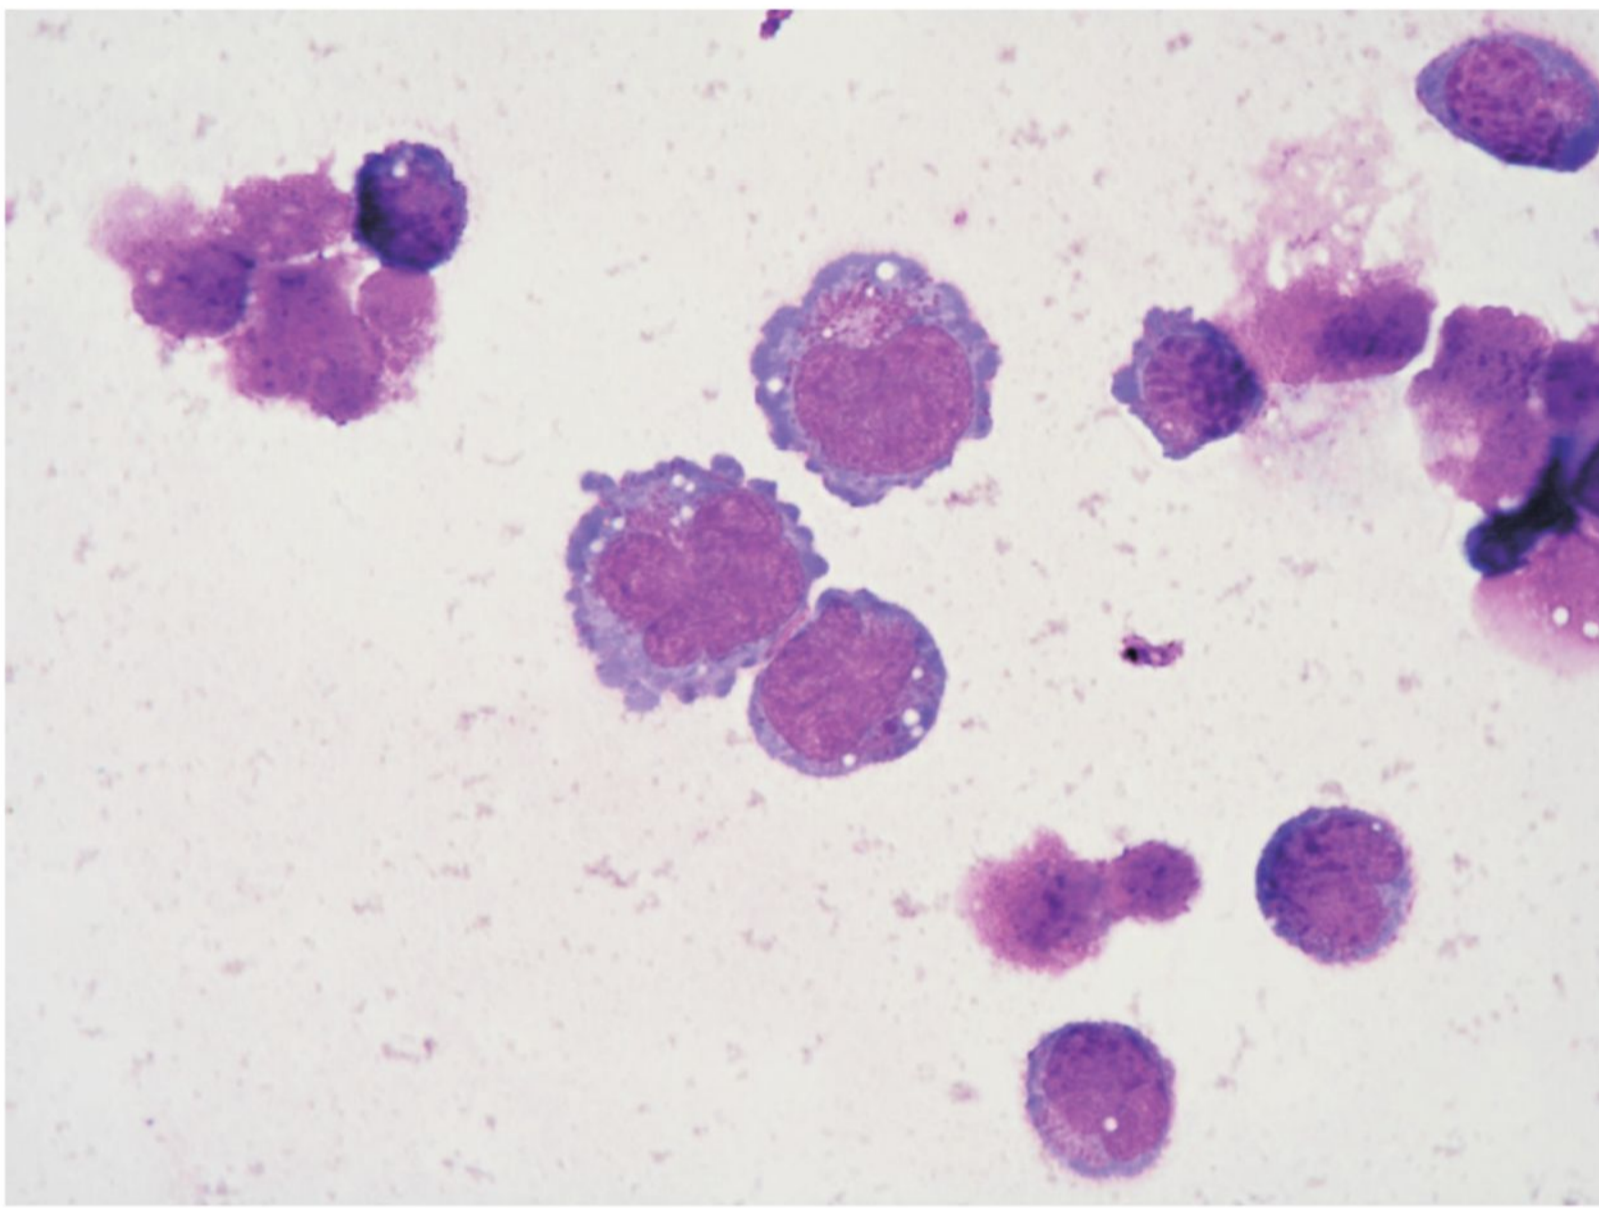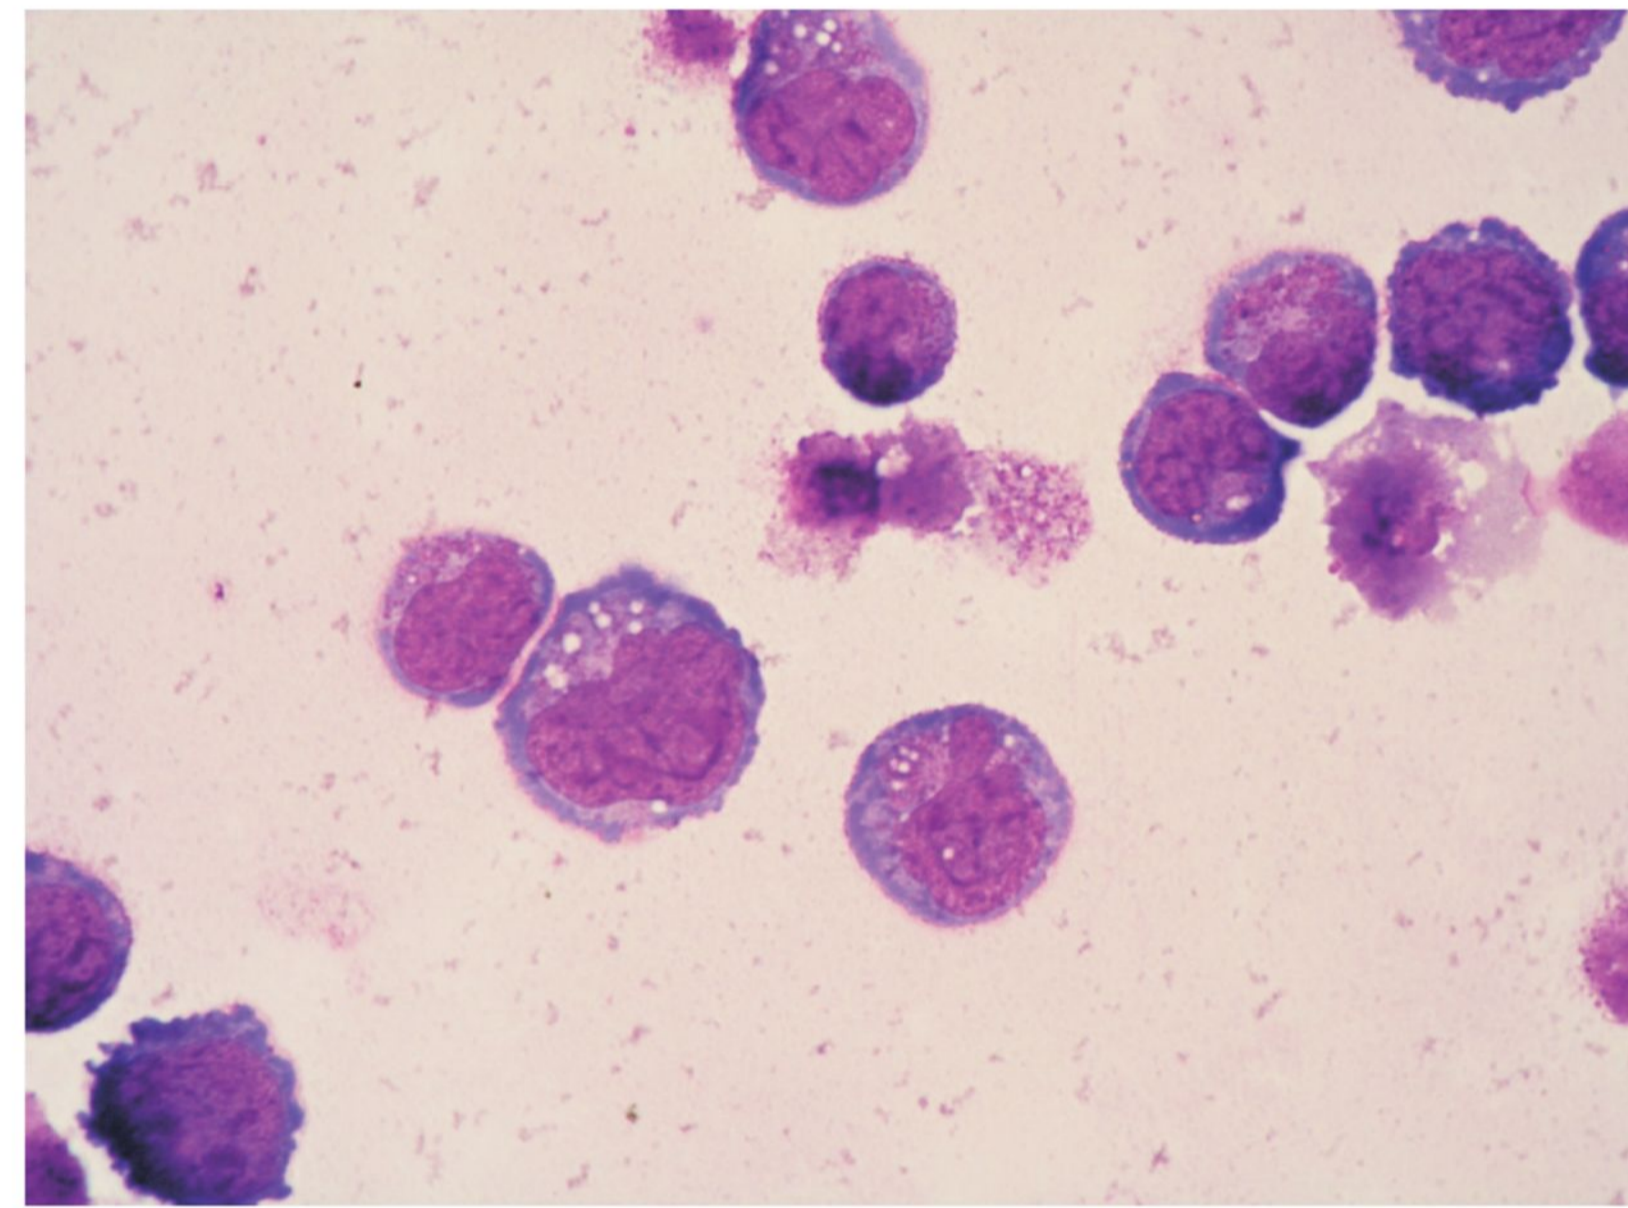

MEL<sup>PUER</sup>+E

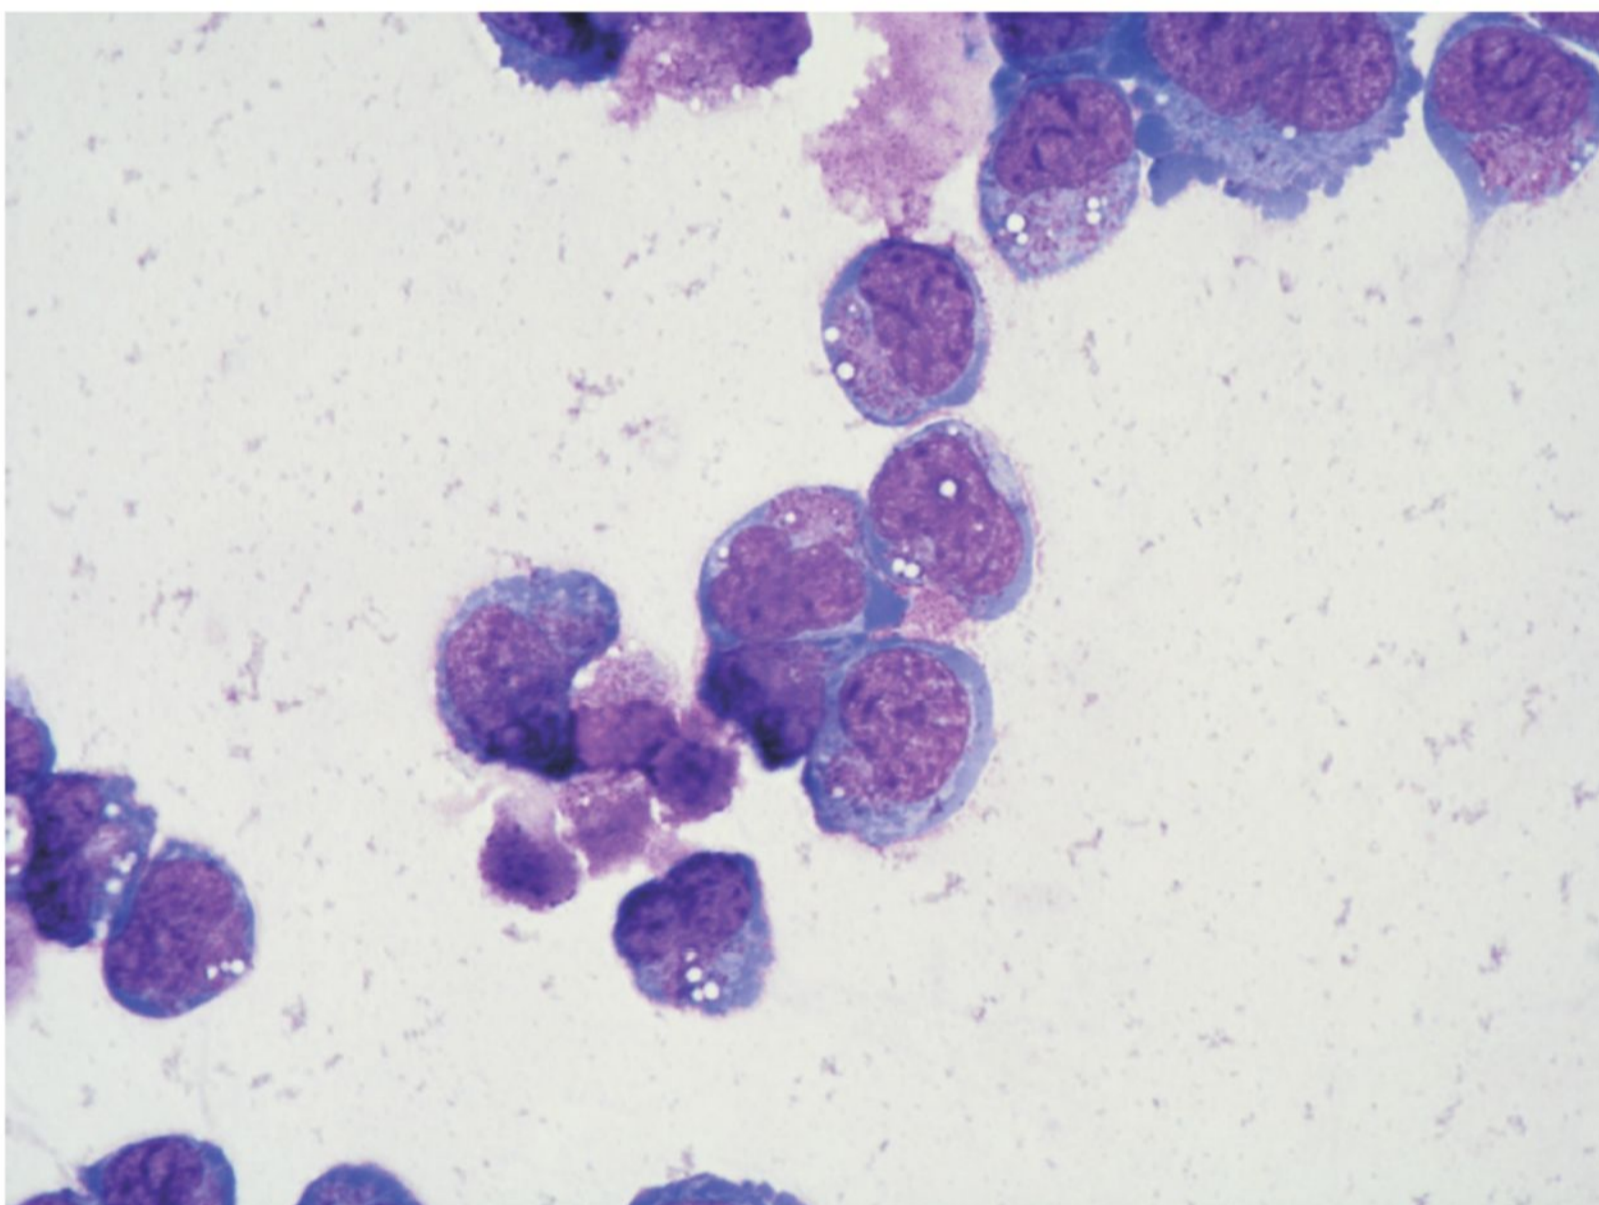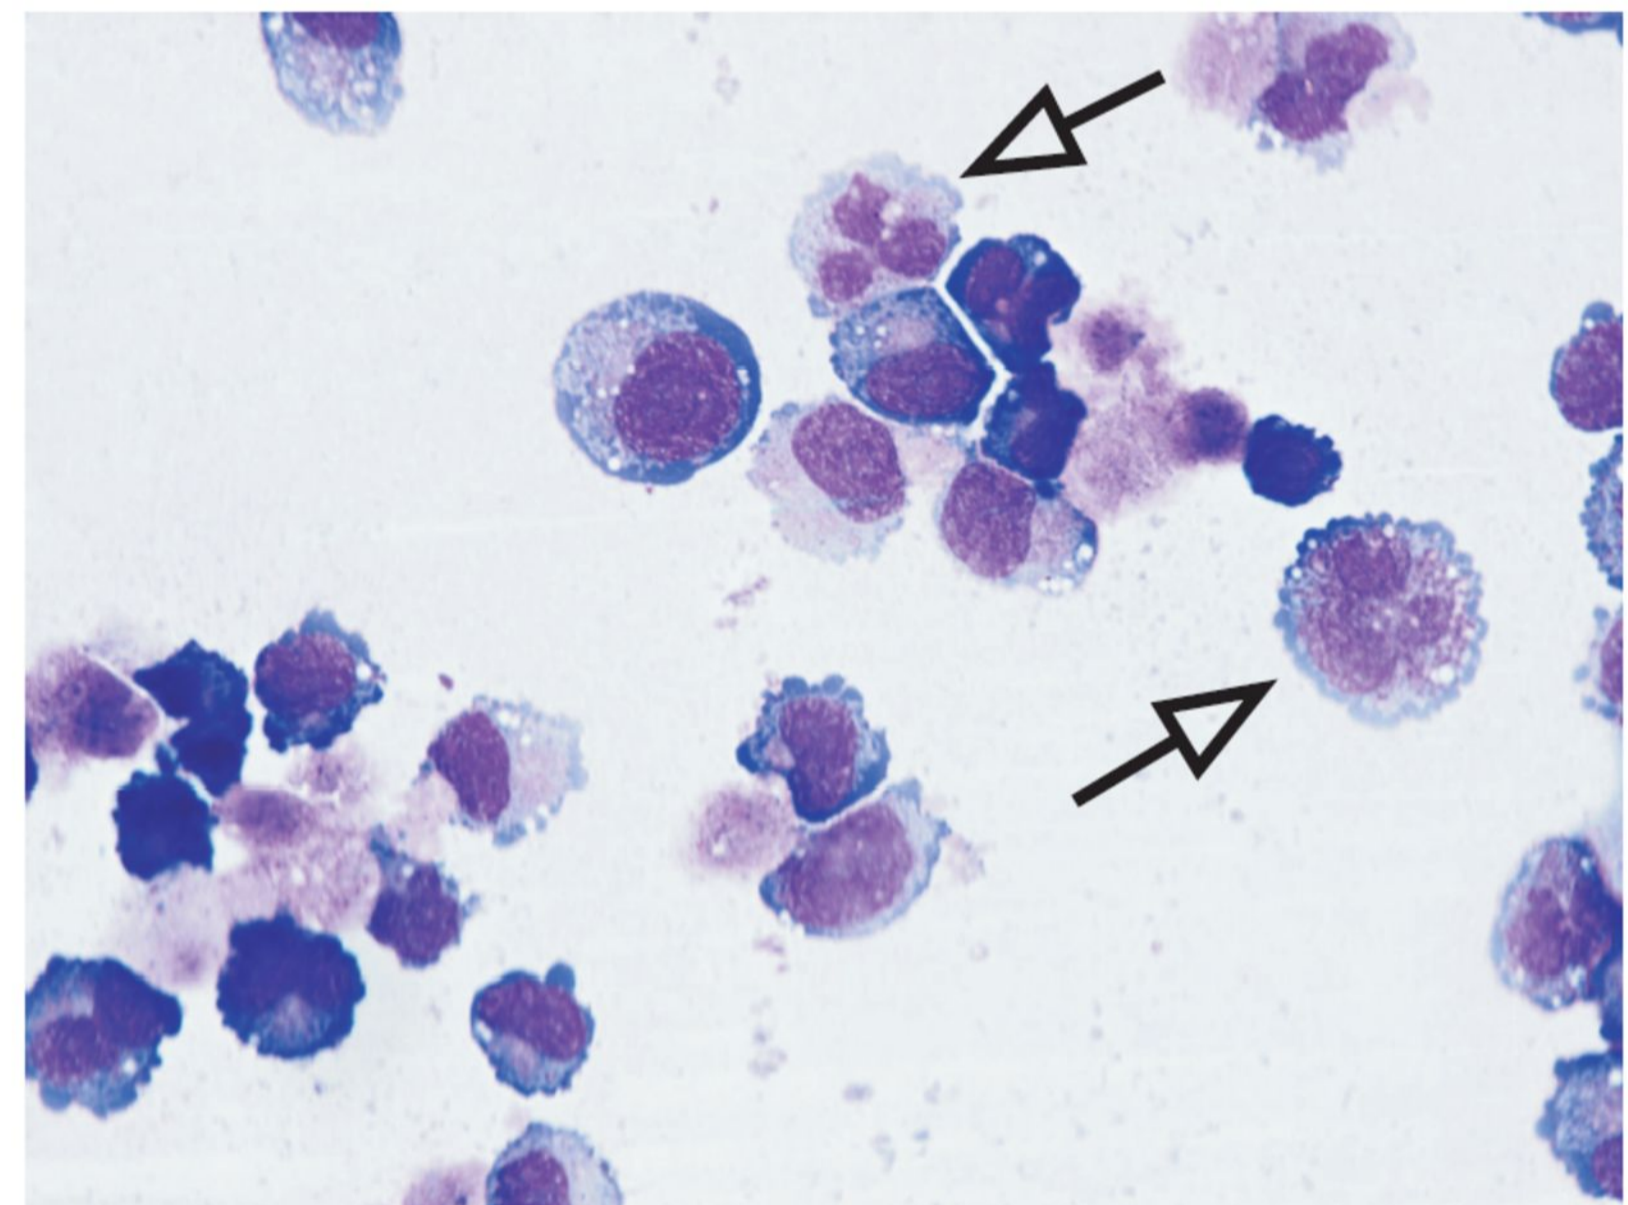

MEL<sup>GER</sup>

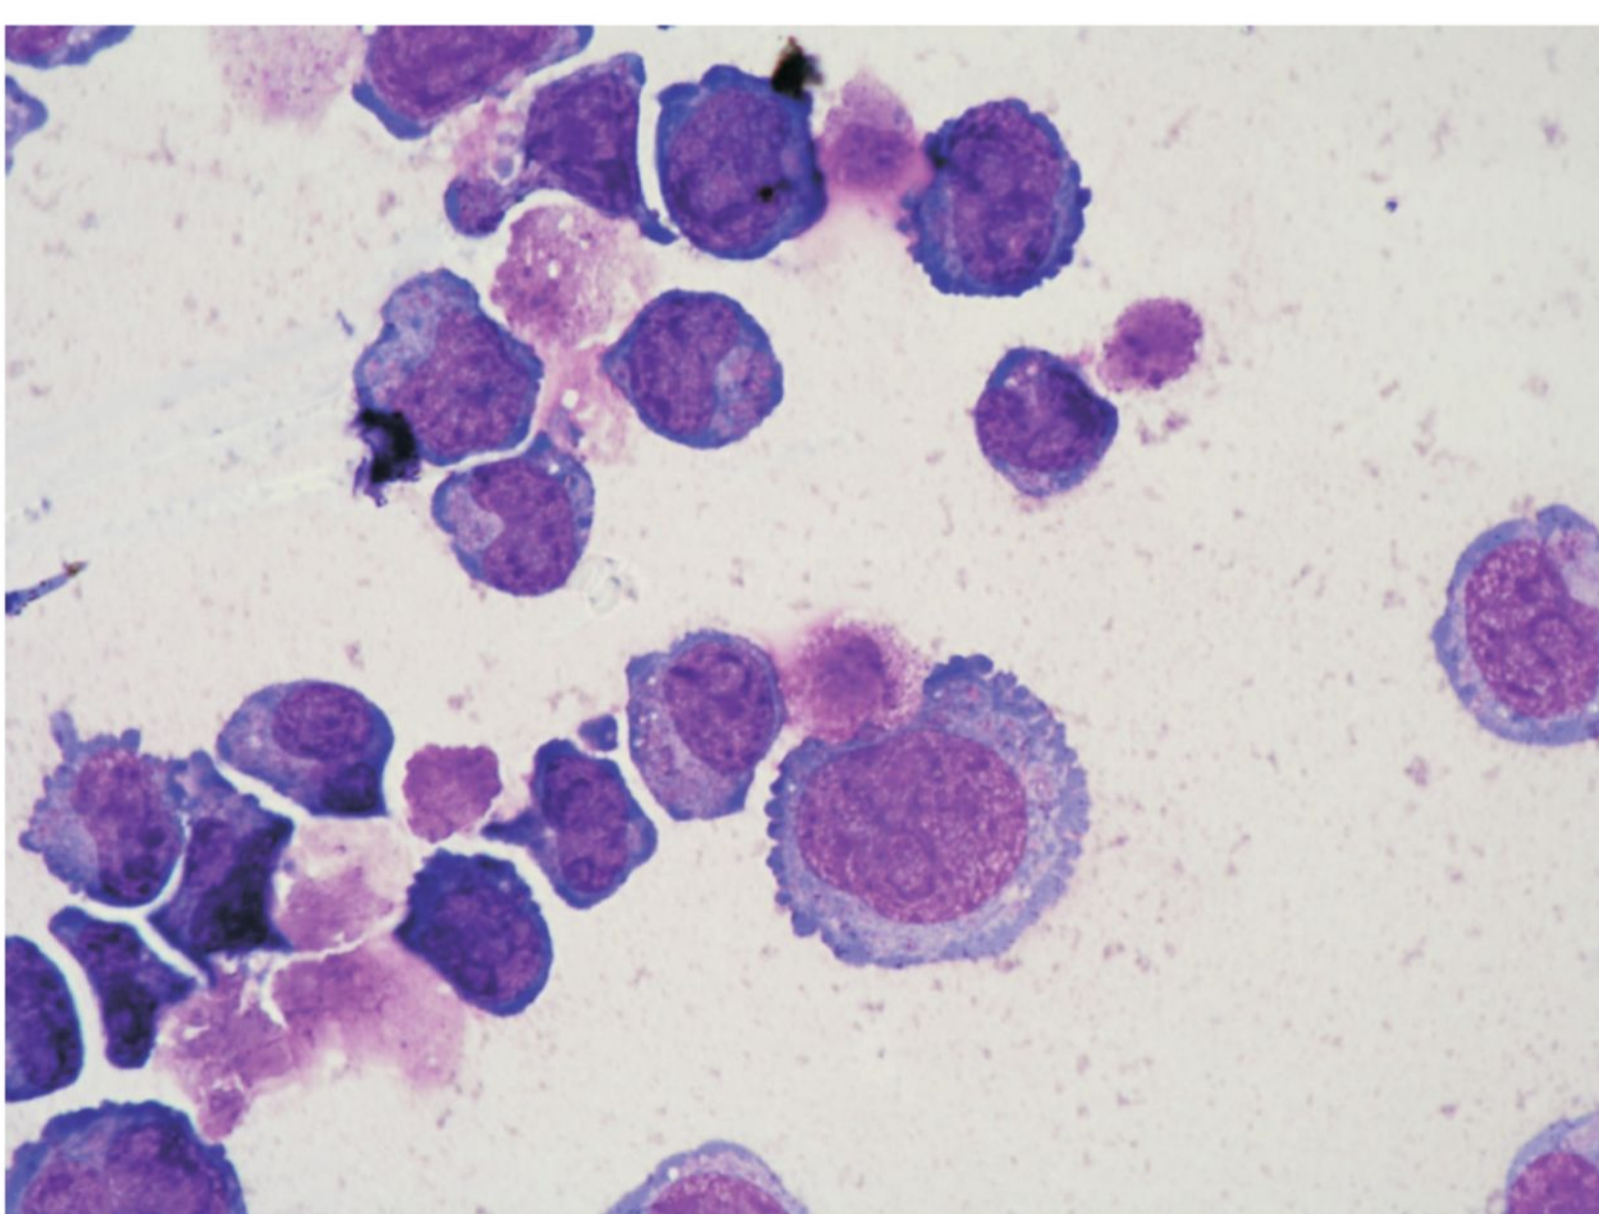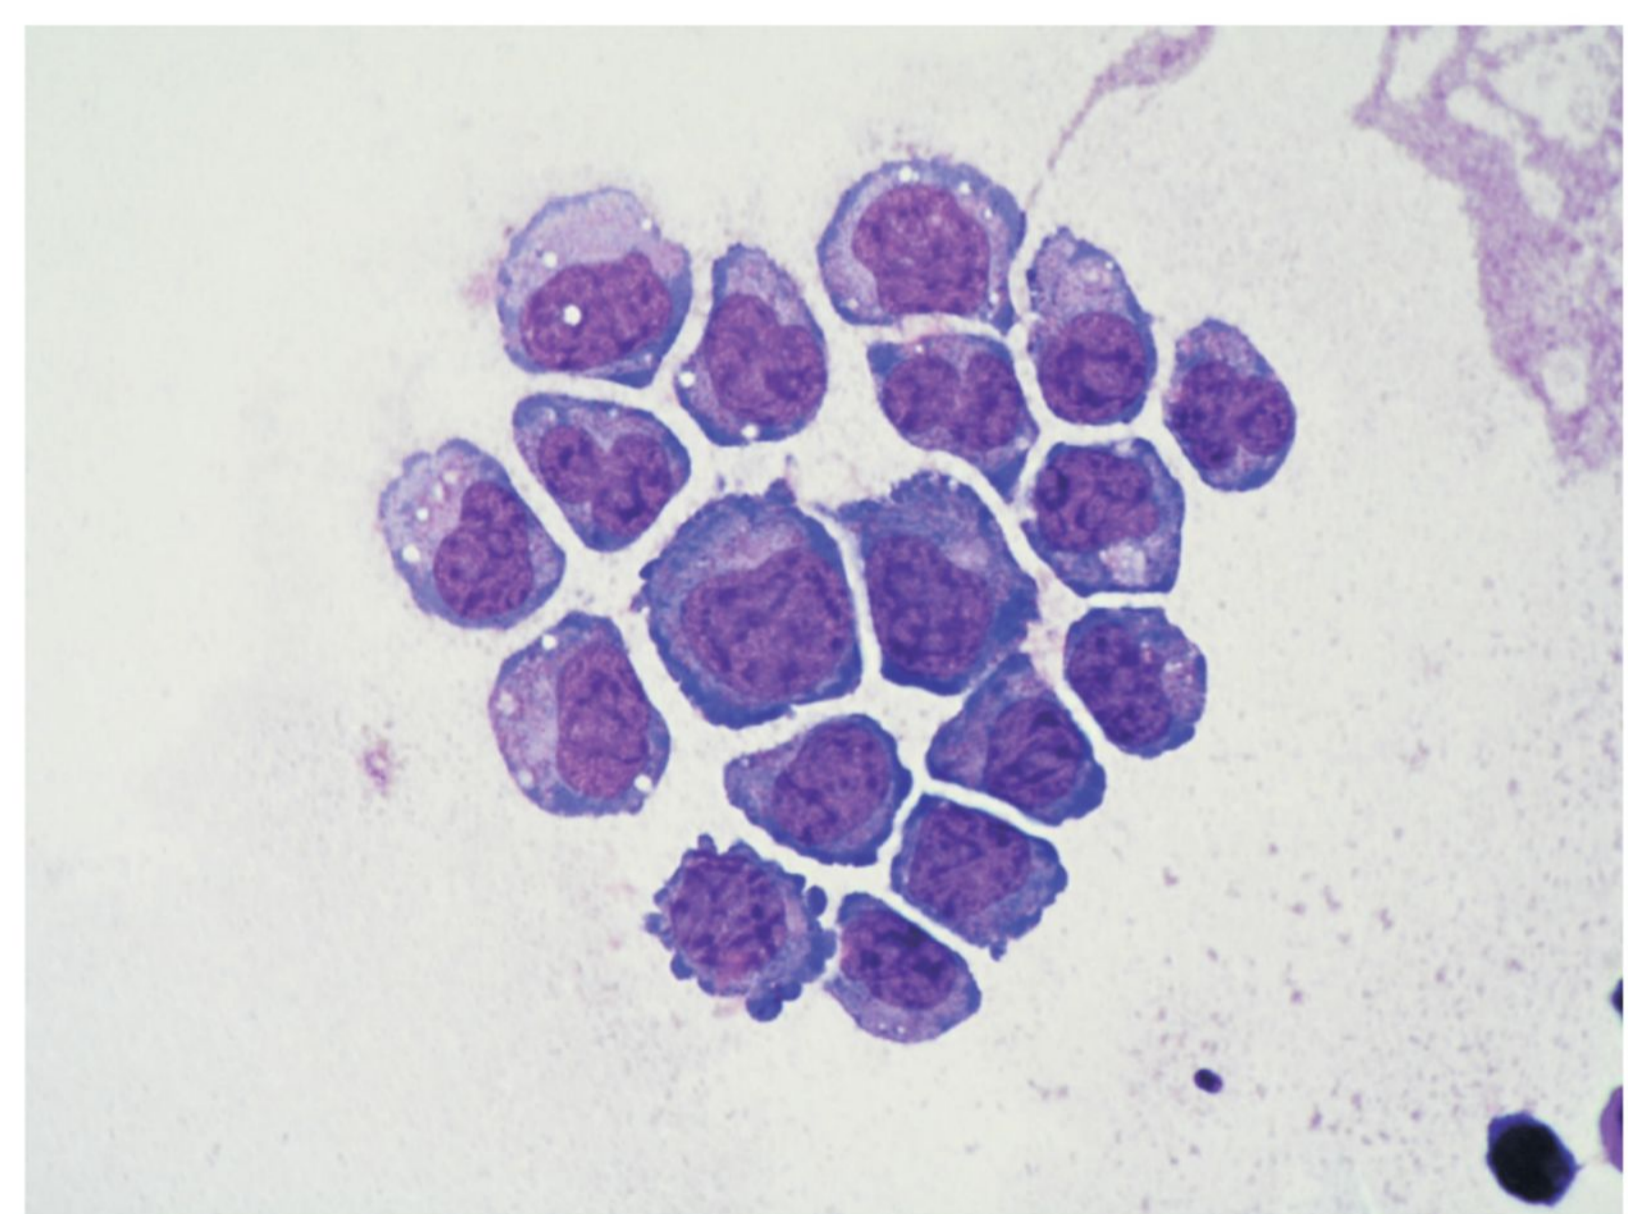

MEL<sup>GER</sup>+E

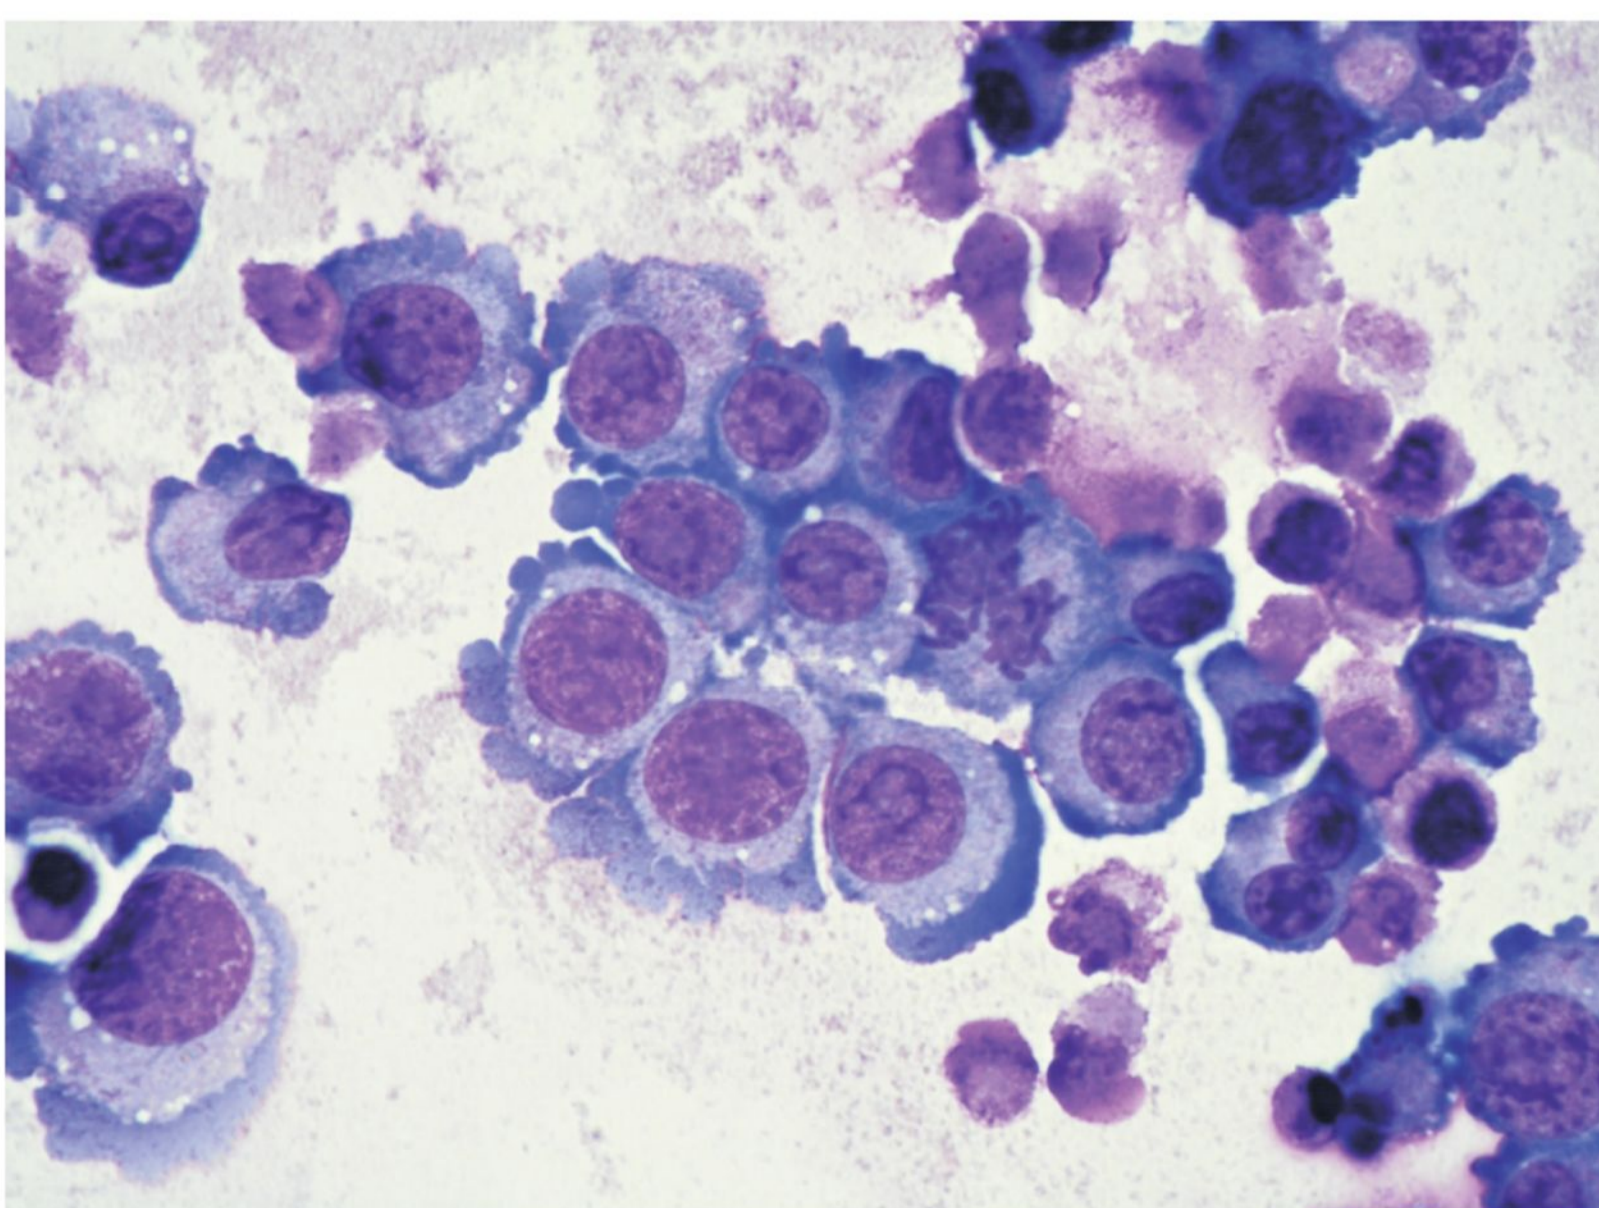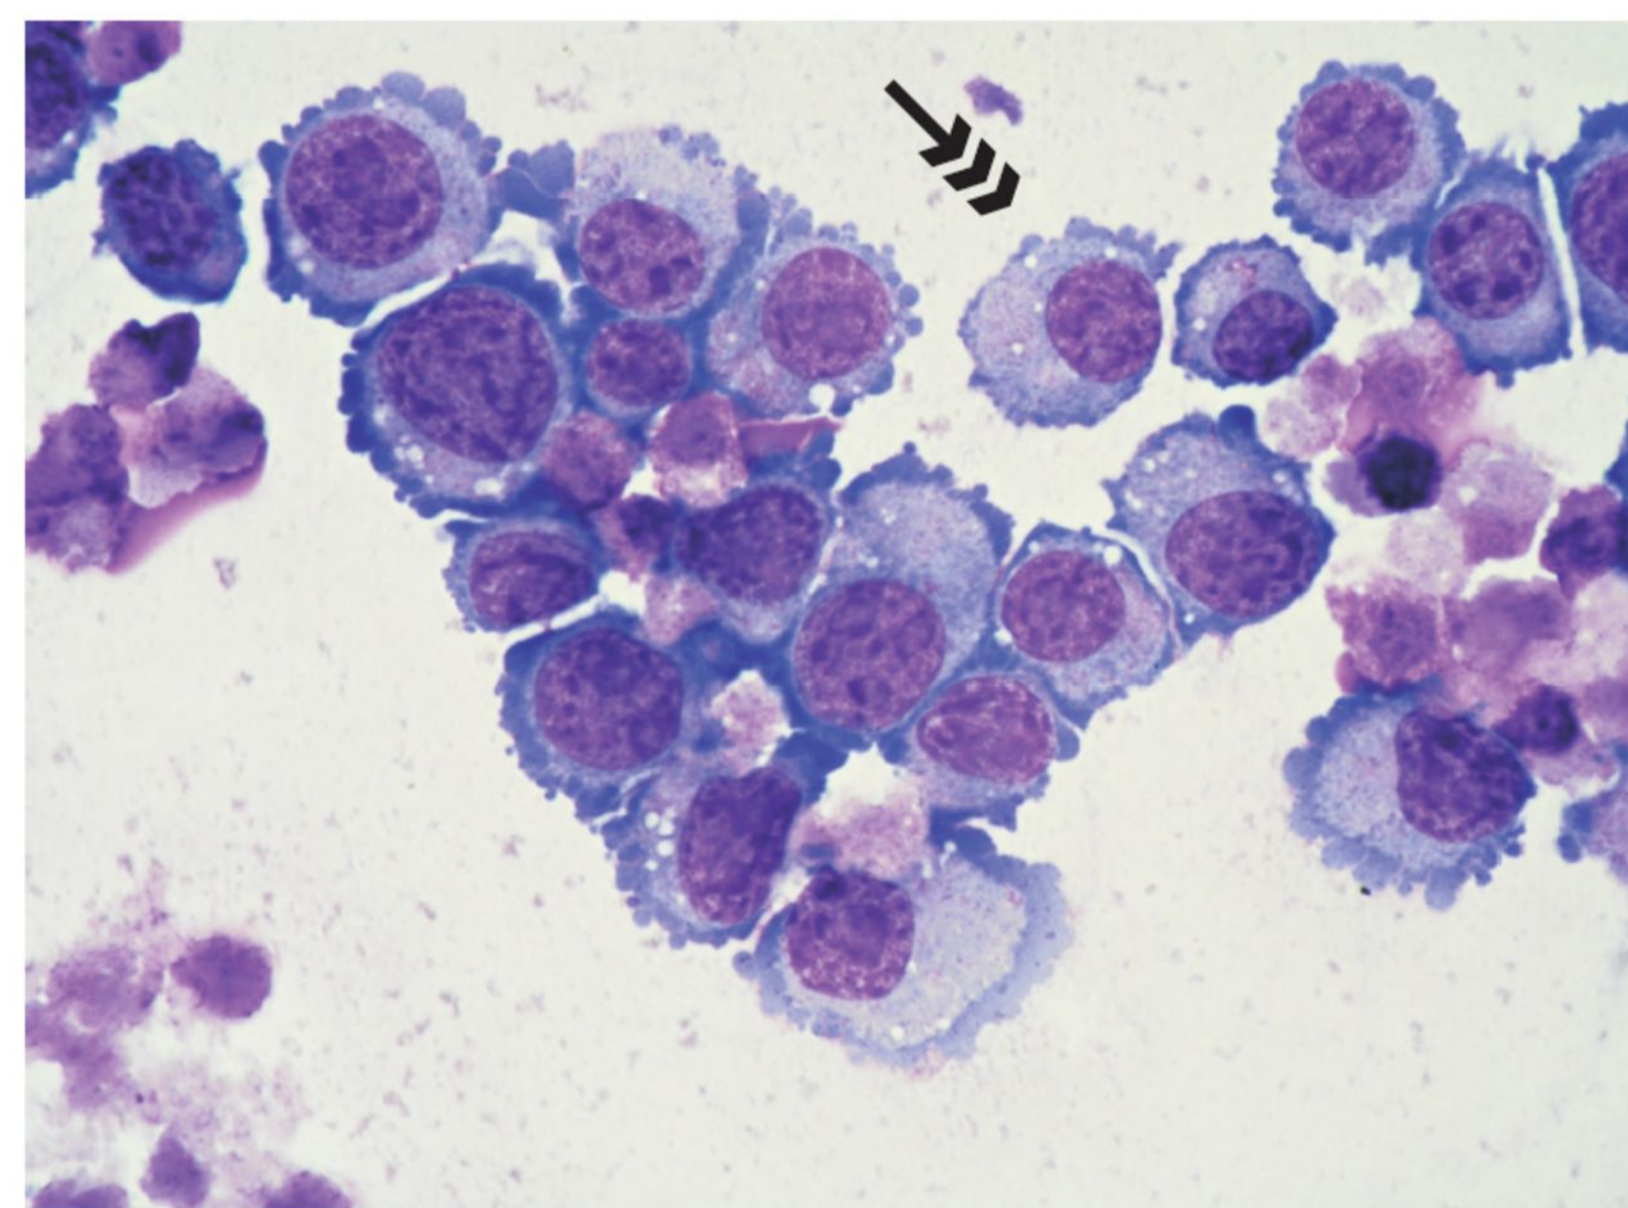

A

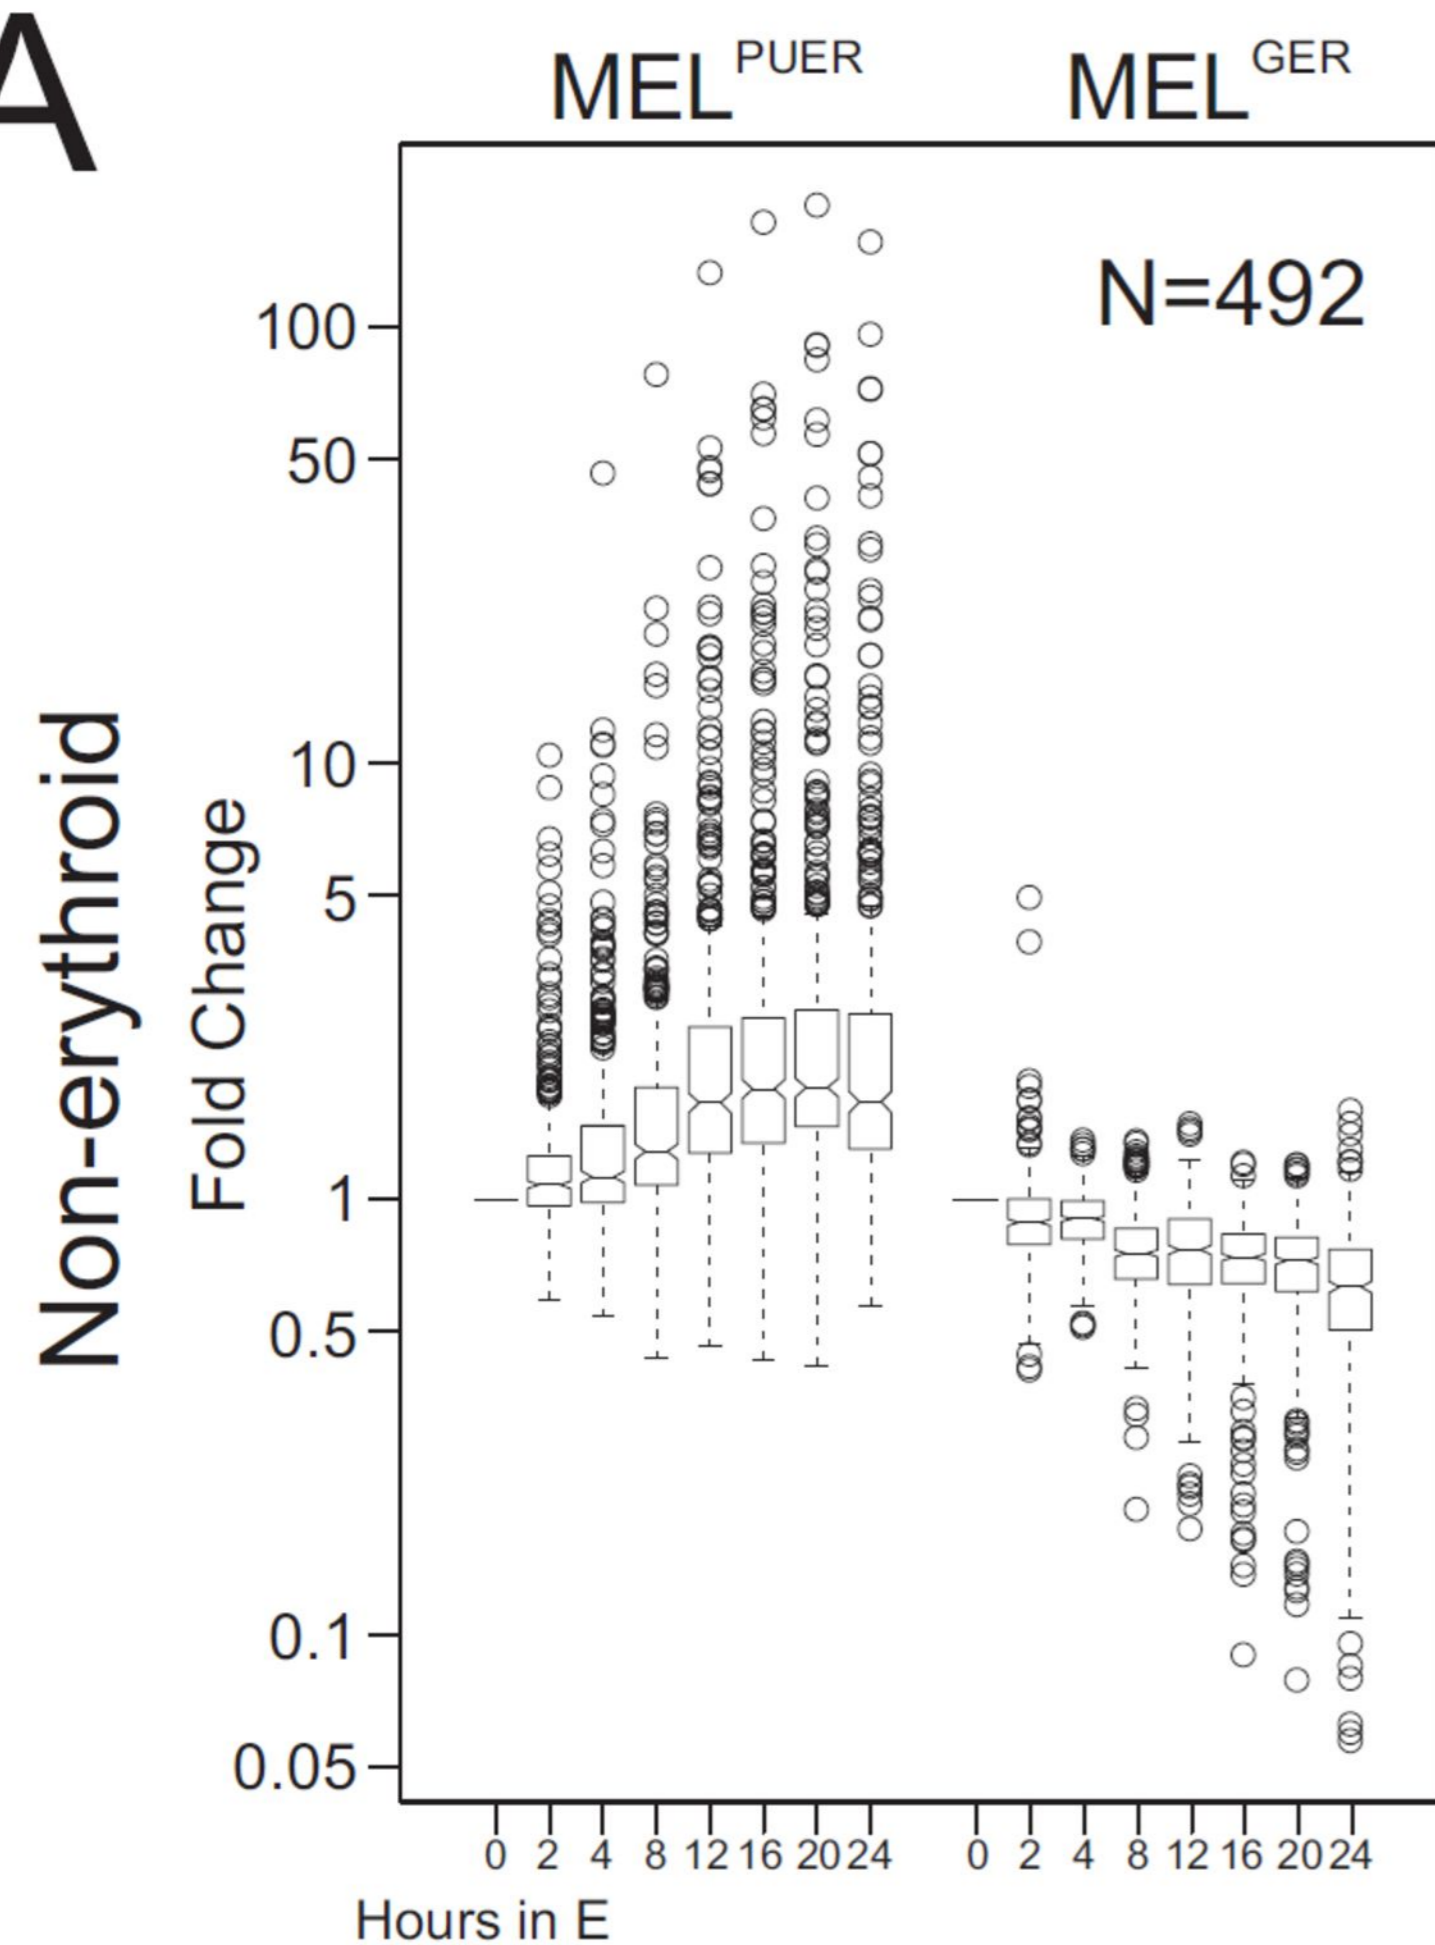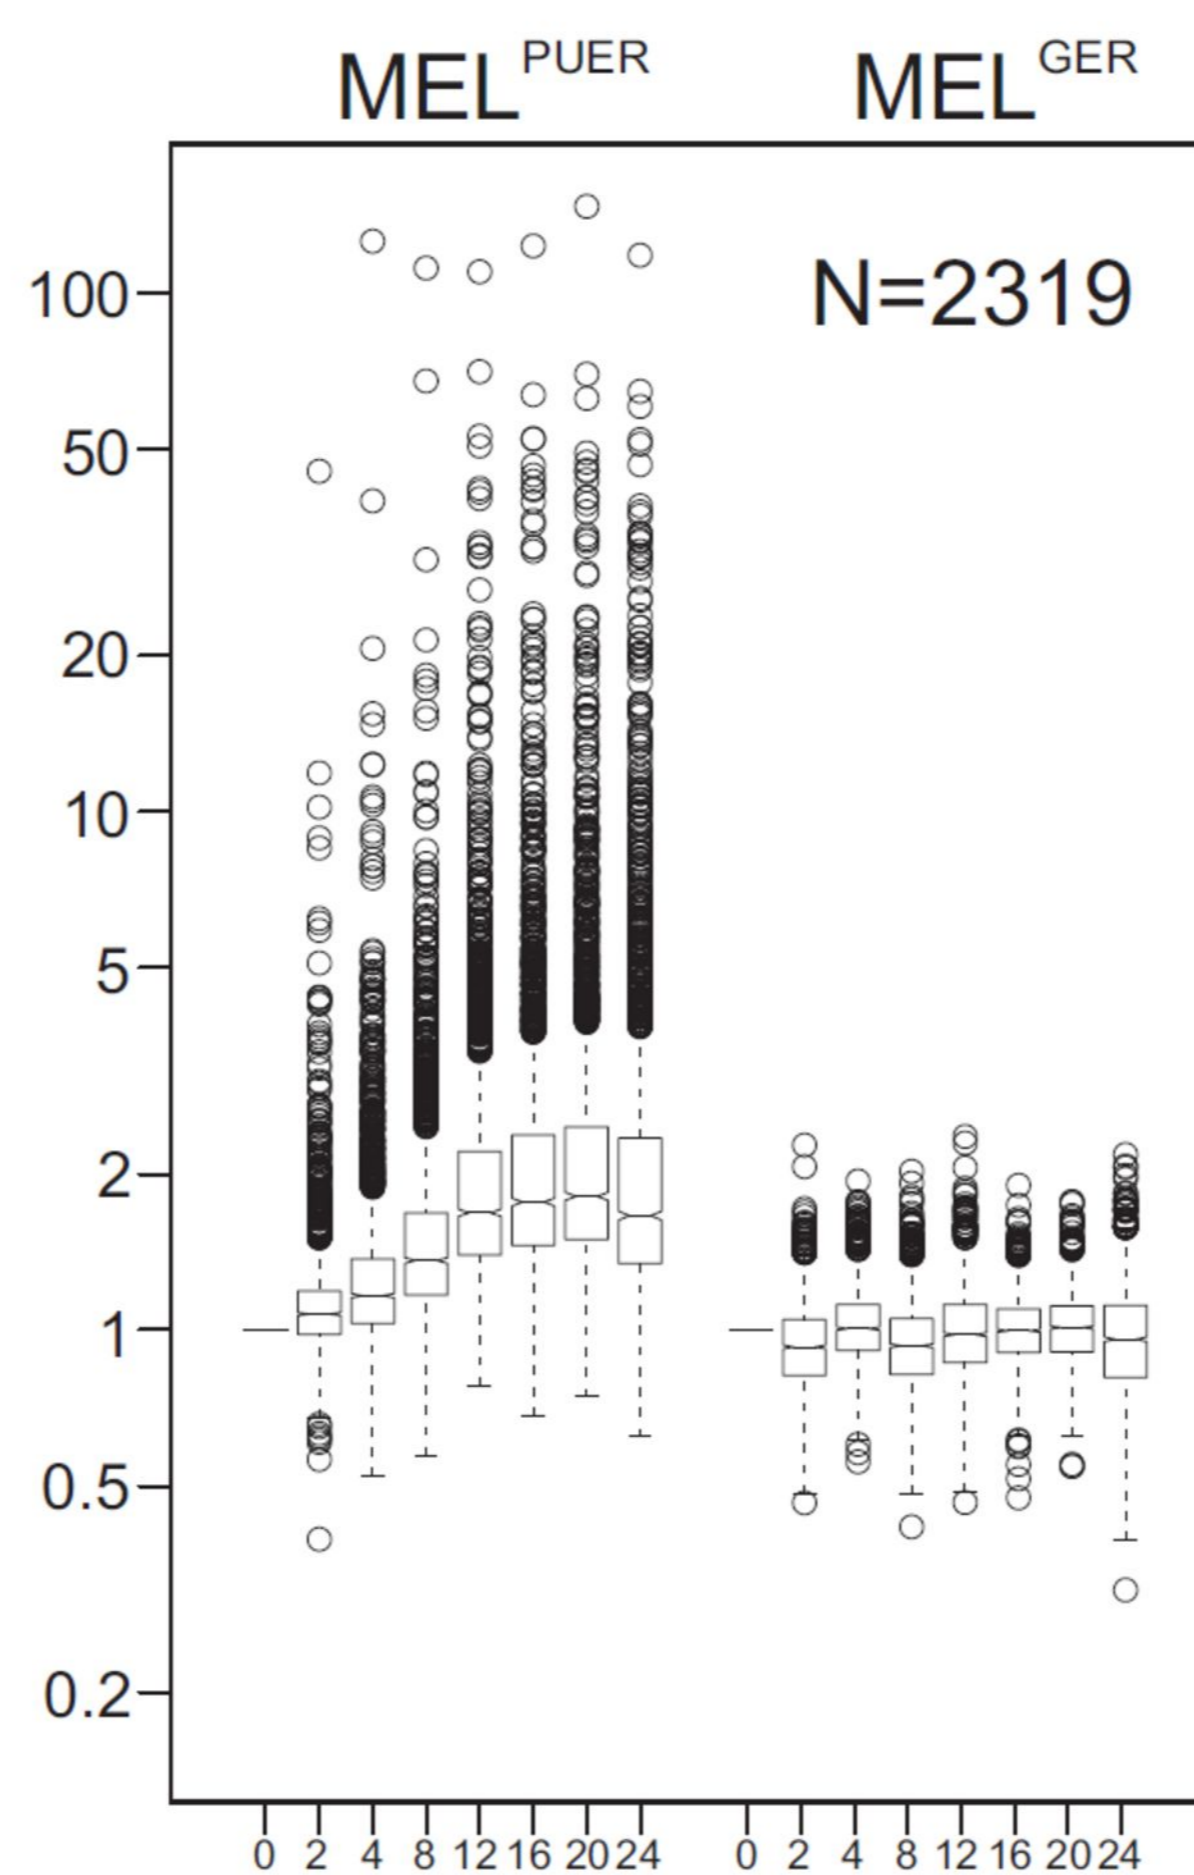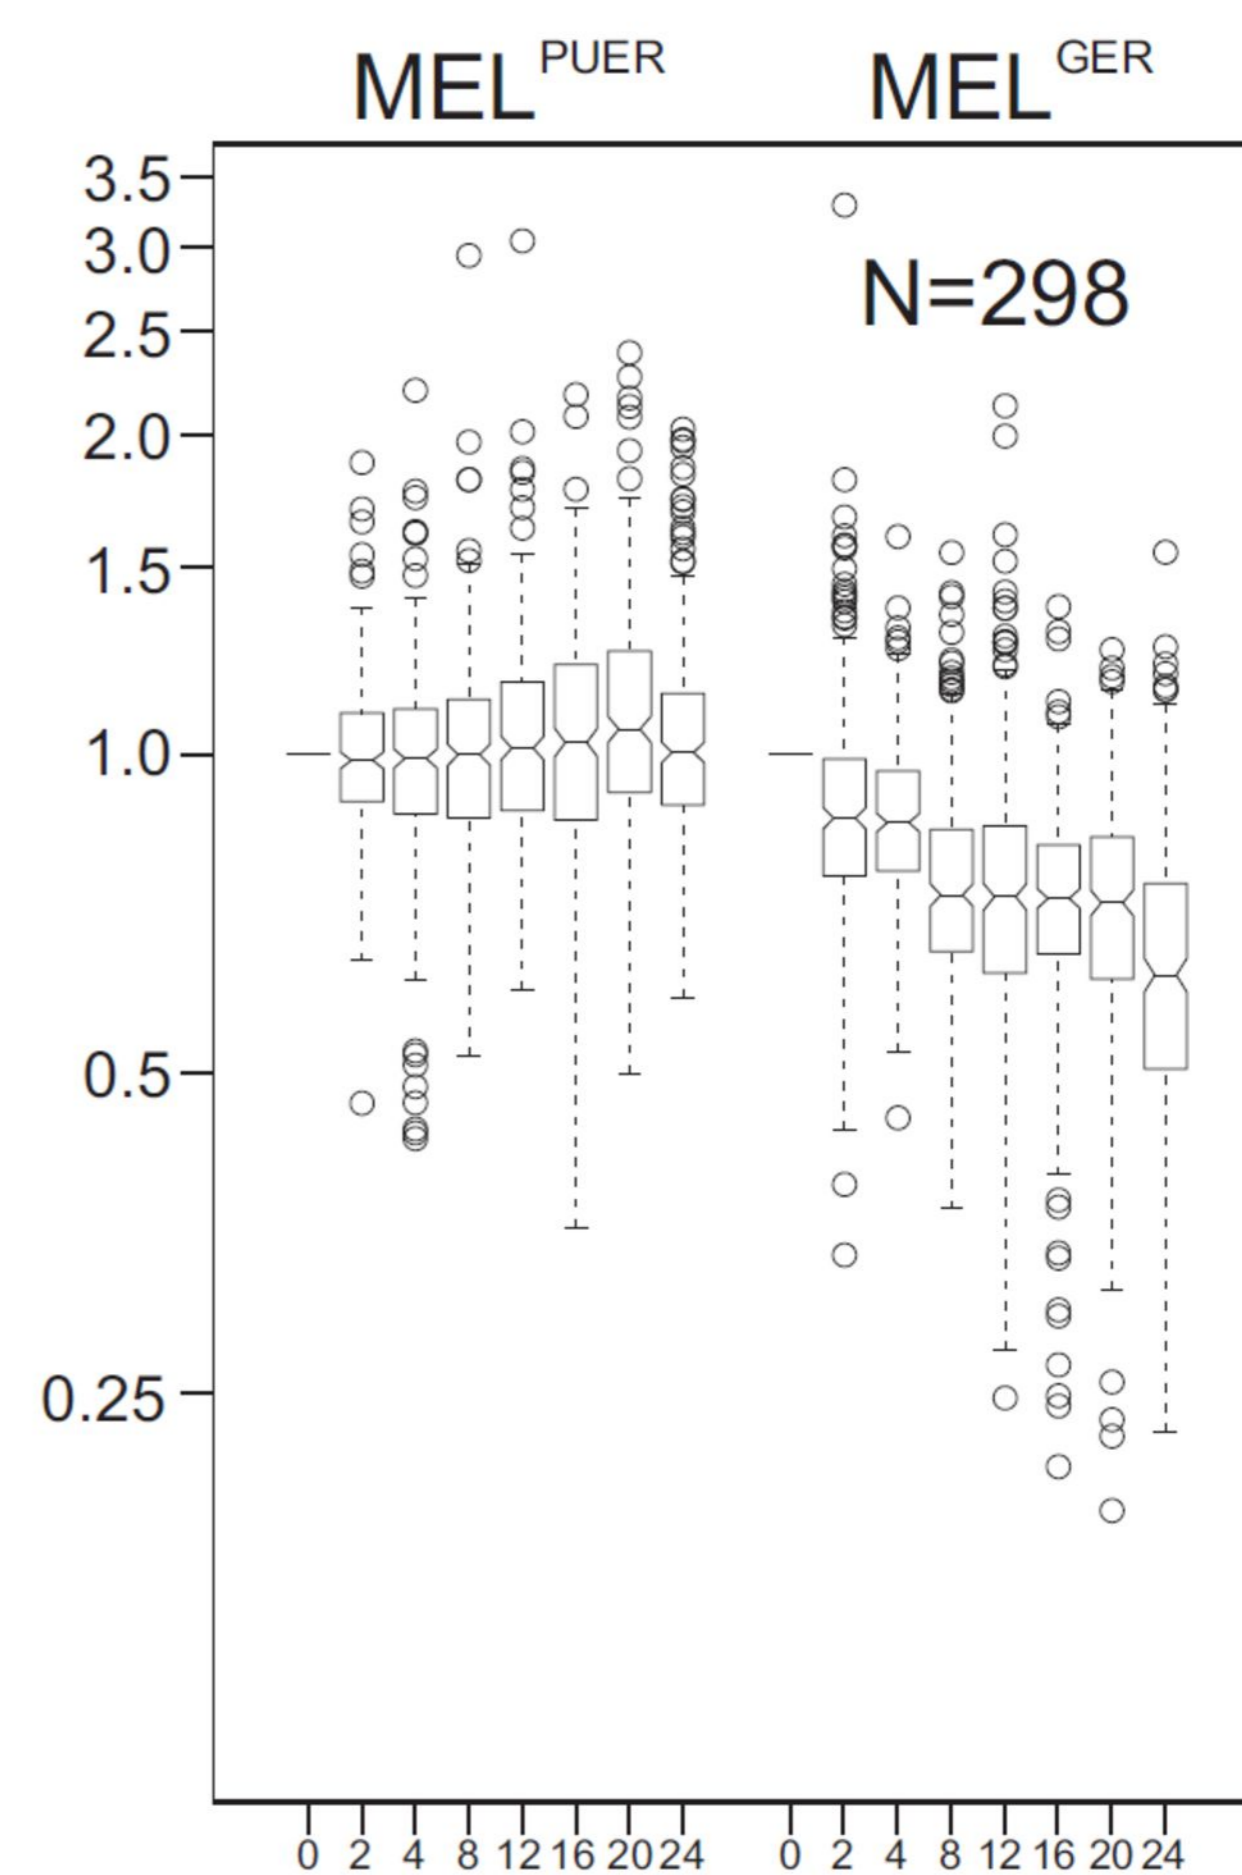

B

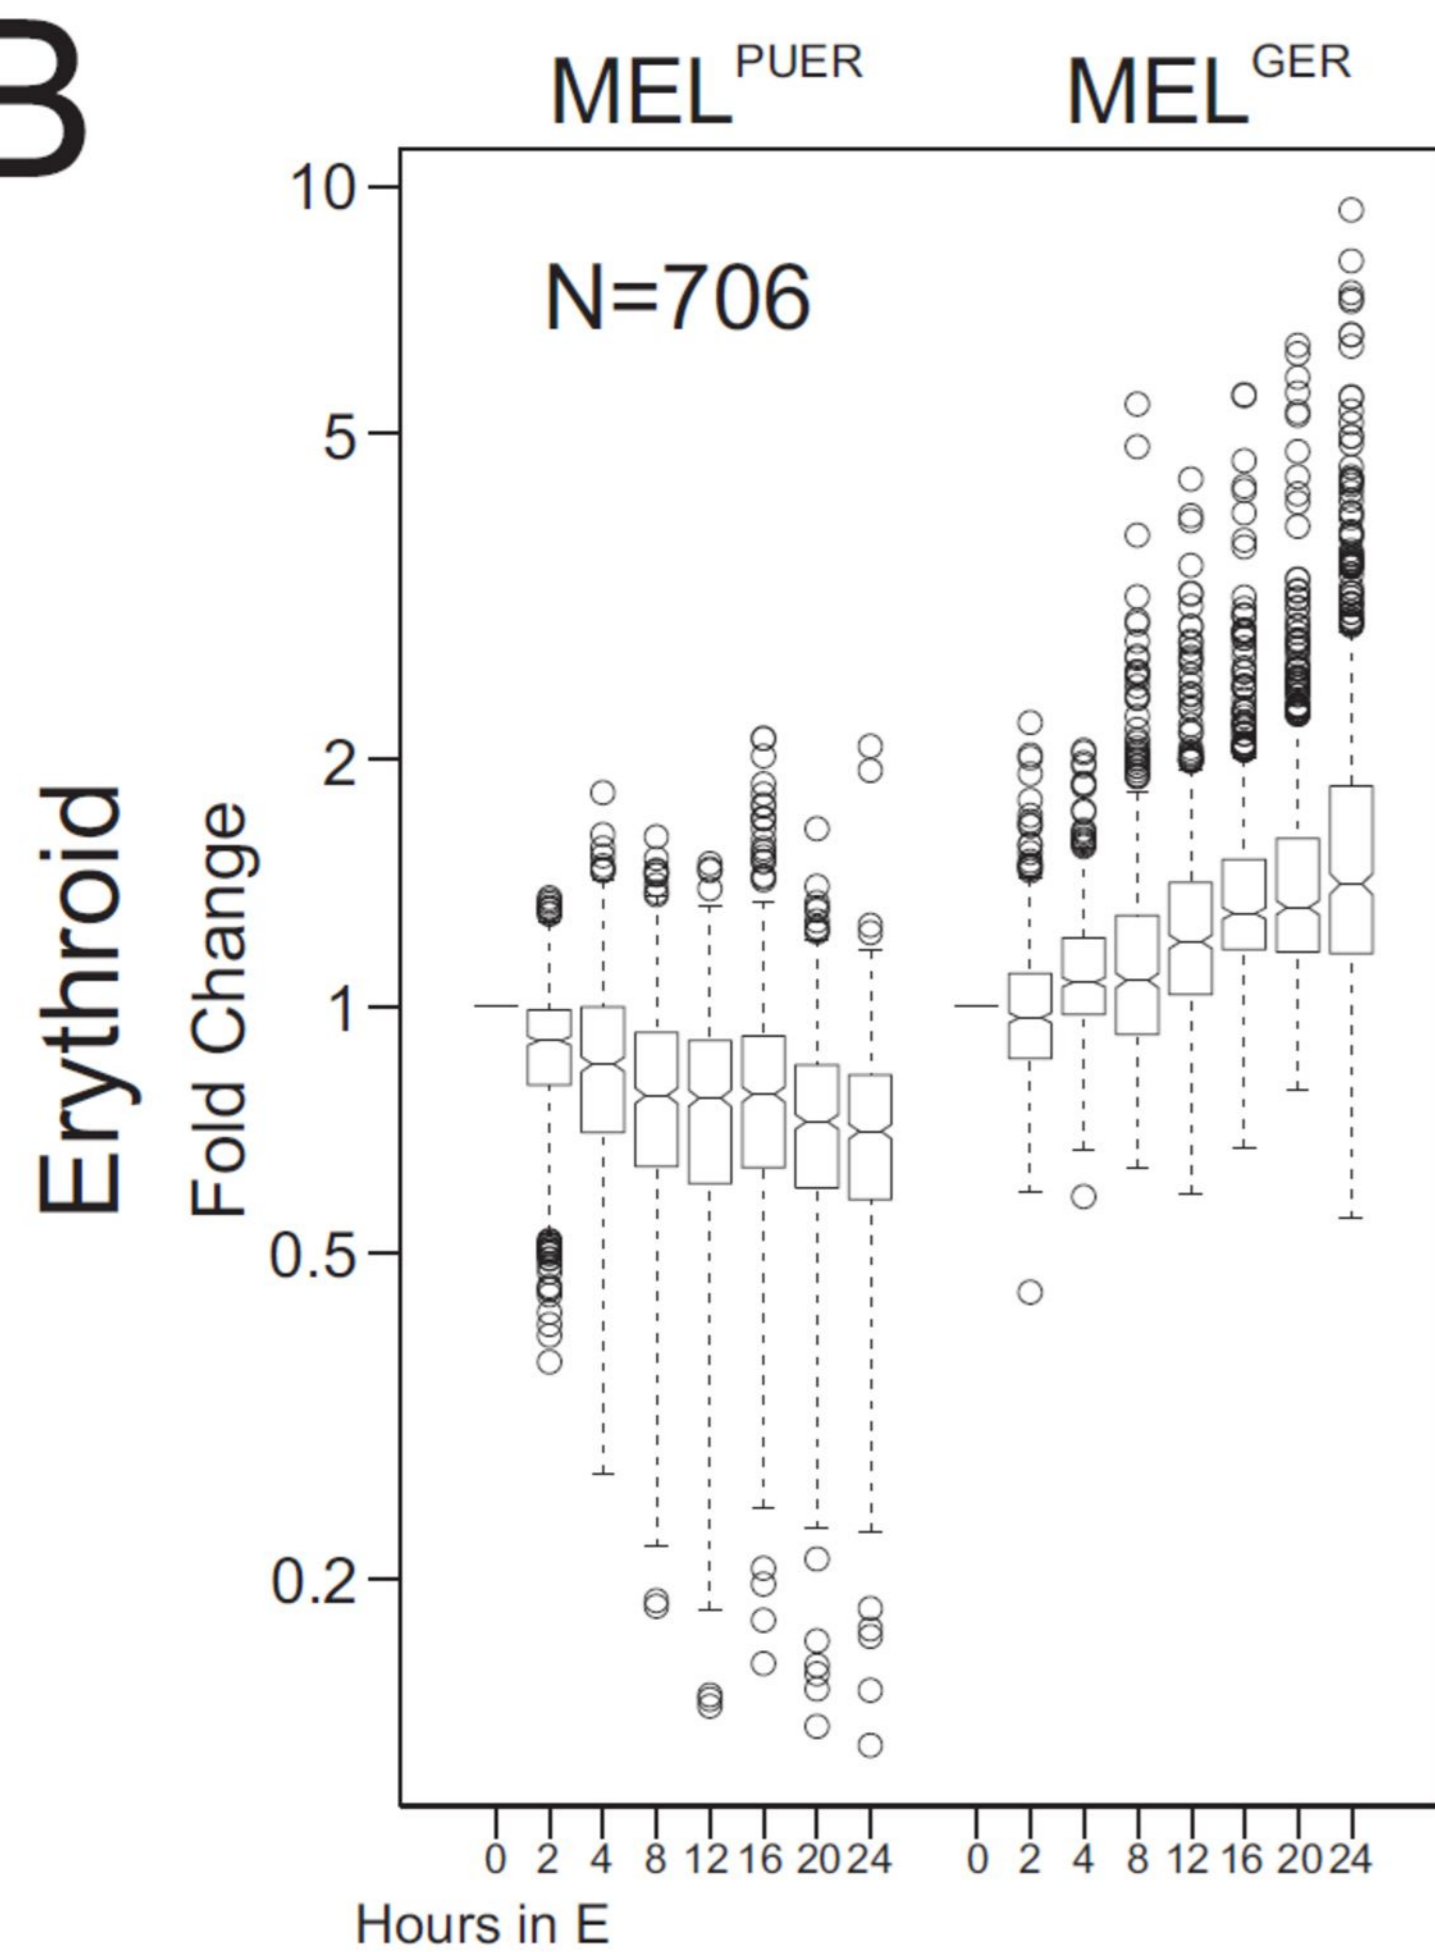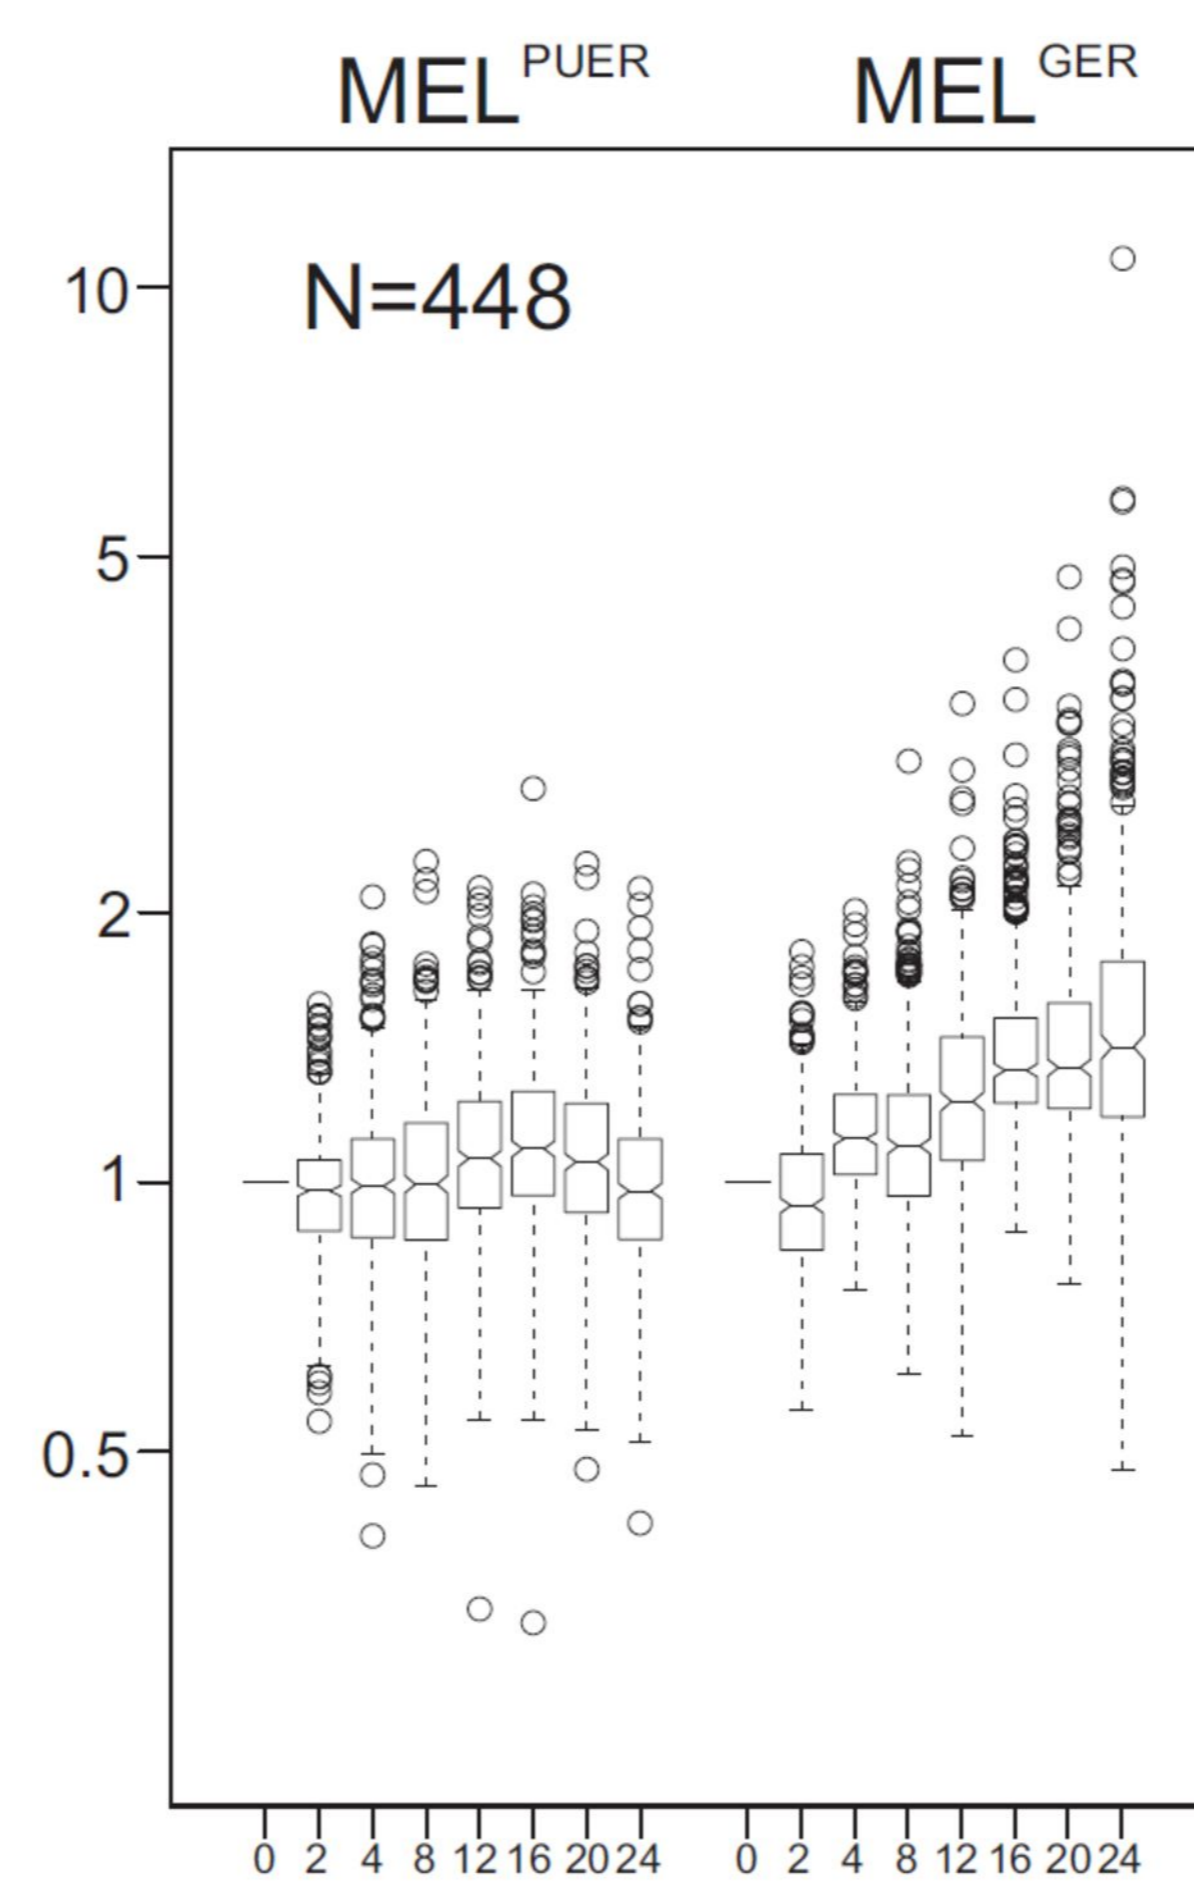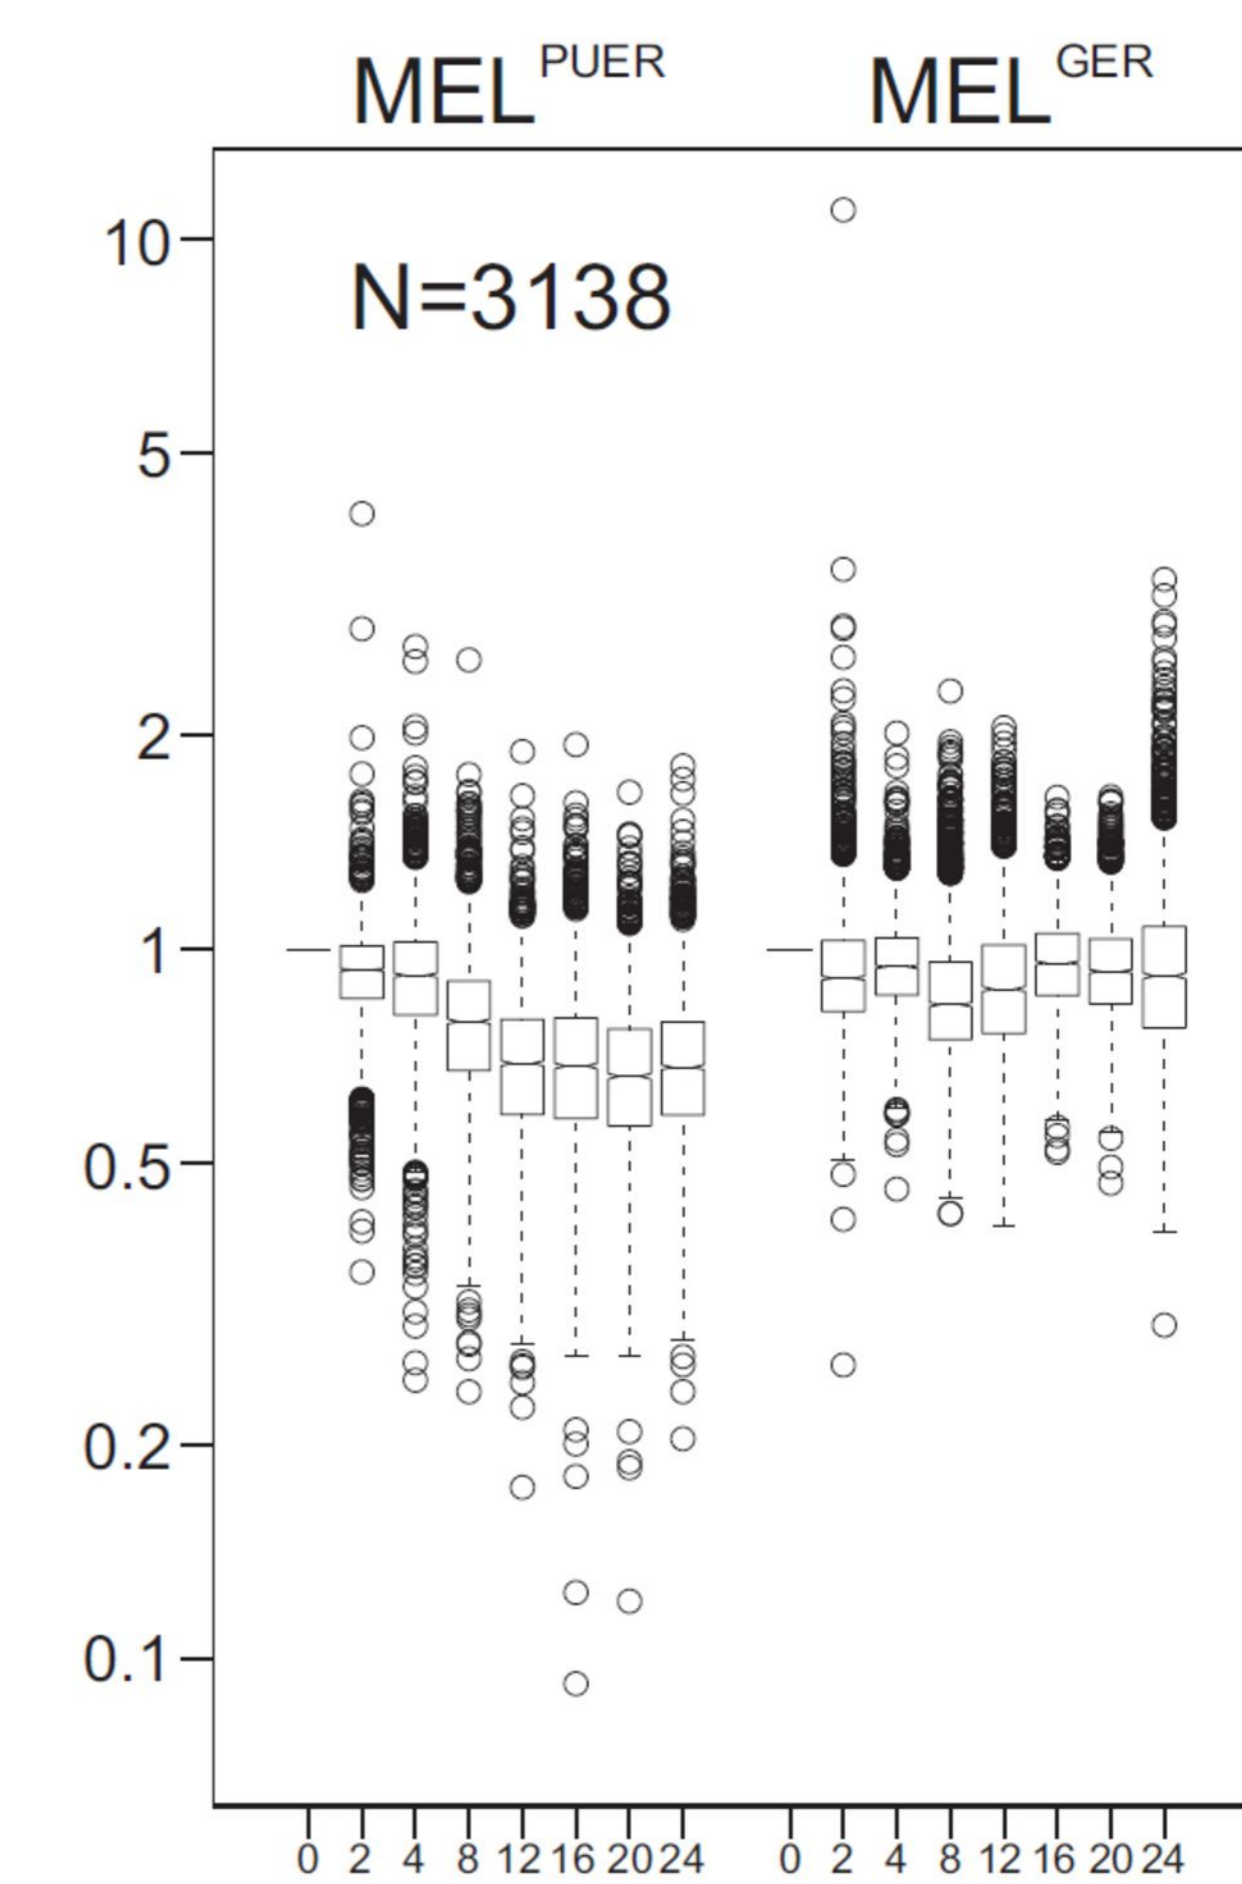

# C: Transcription and chromatin remodelling factors

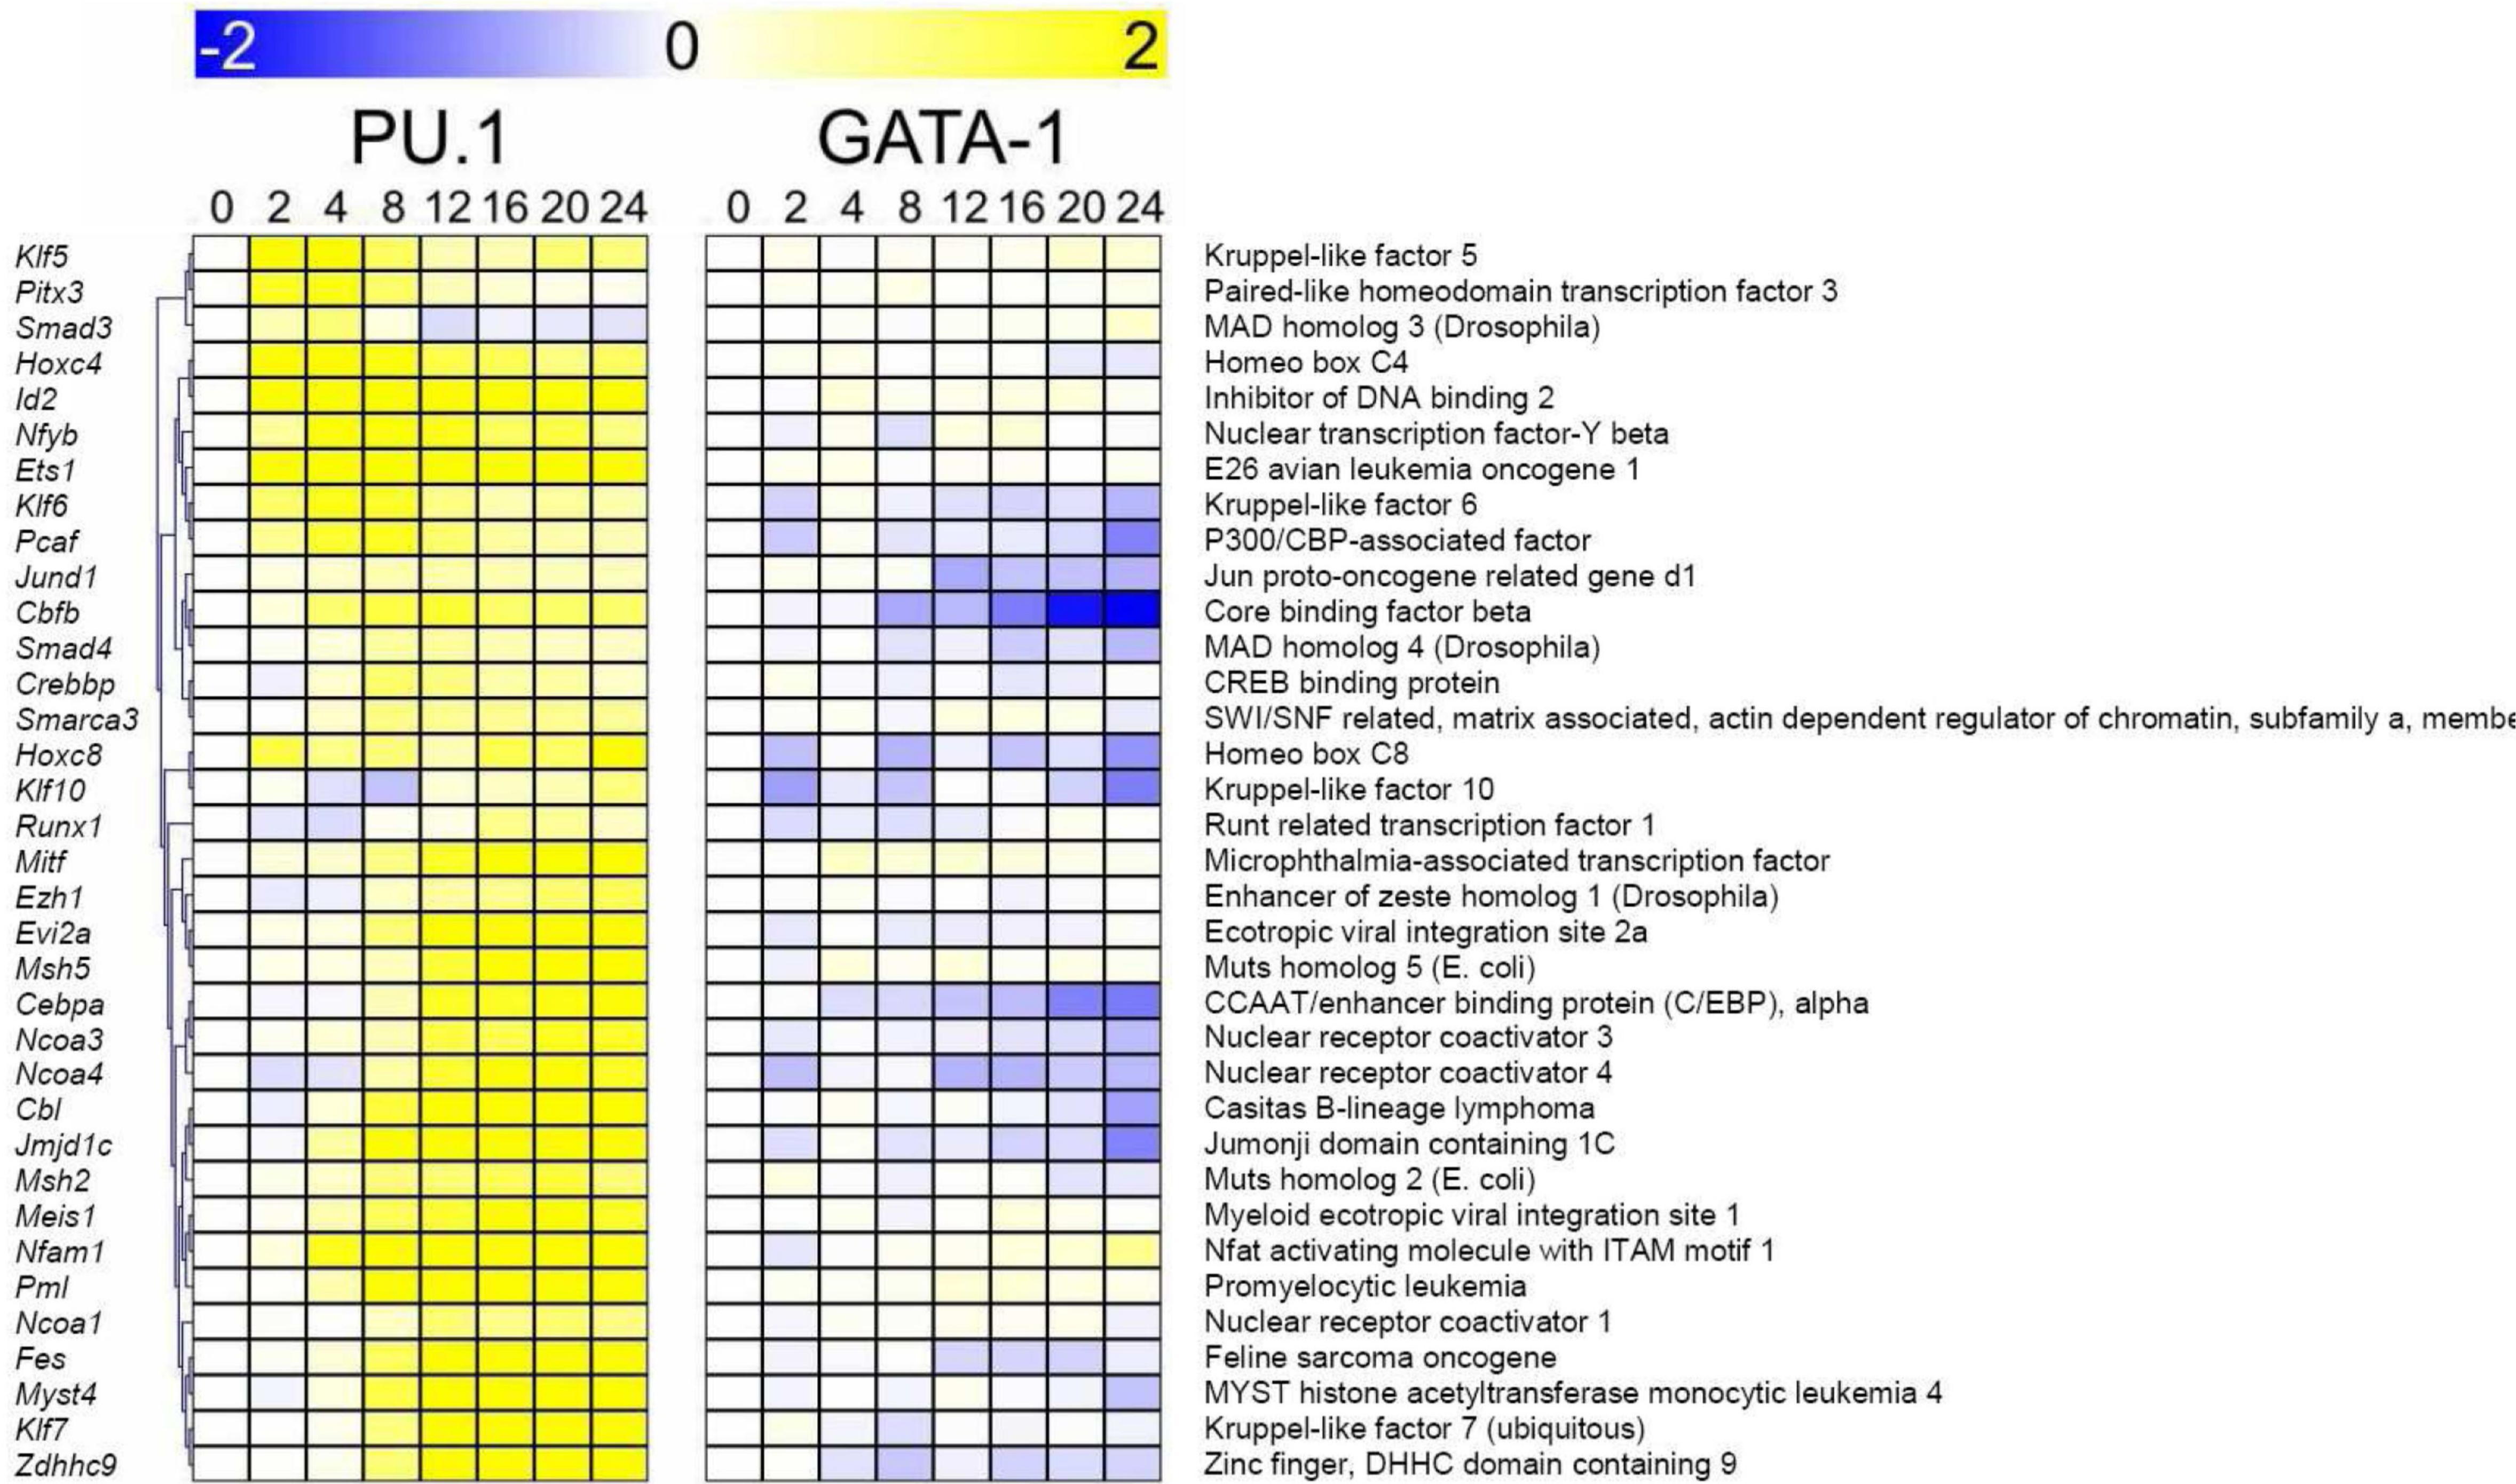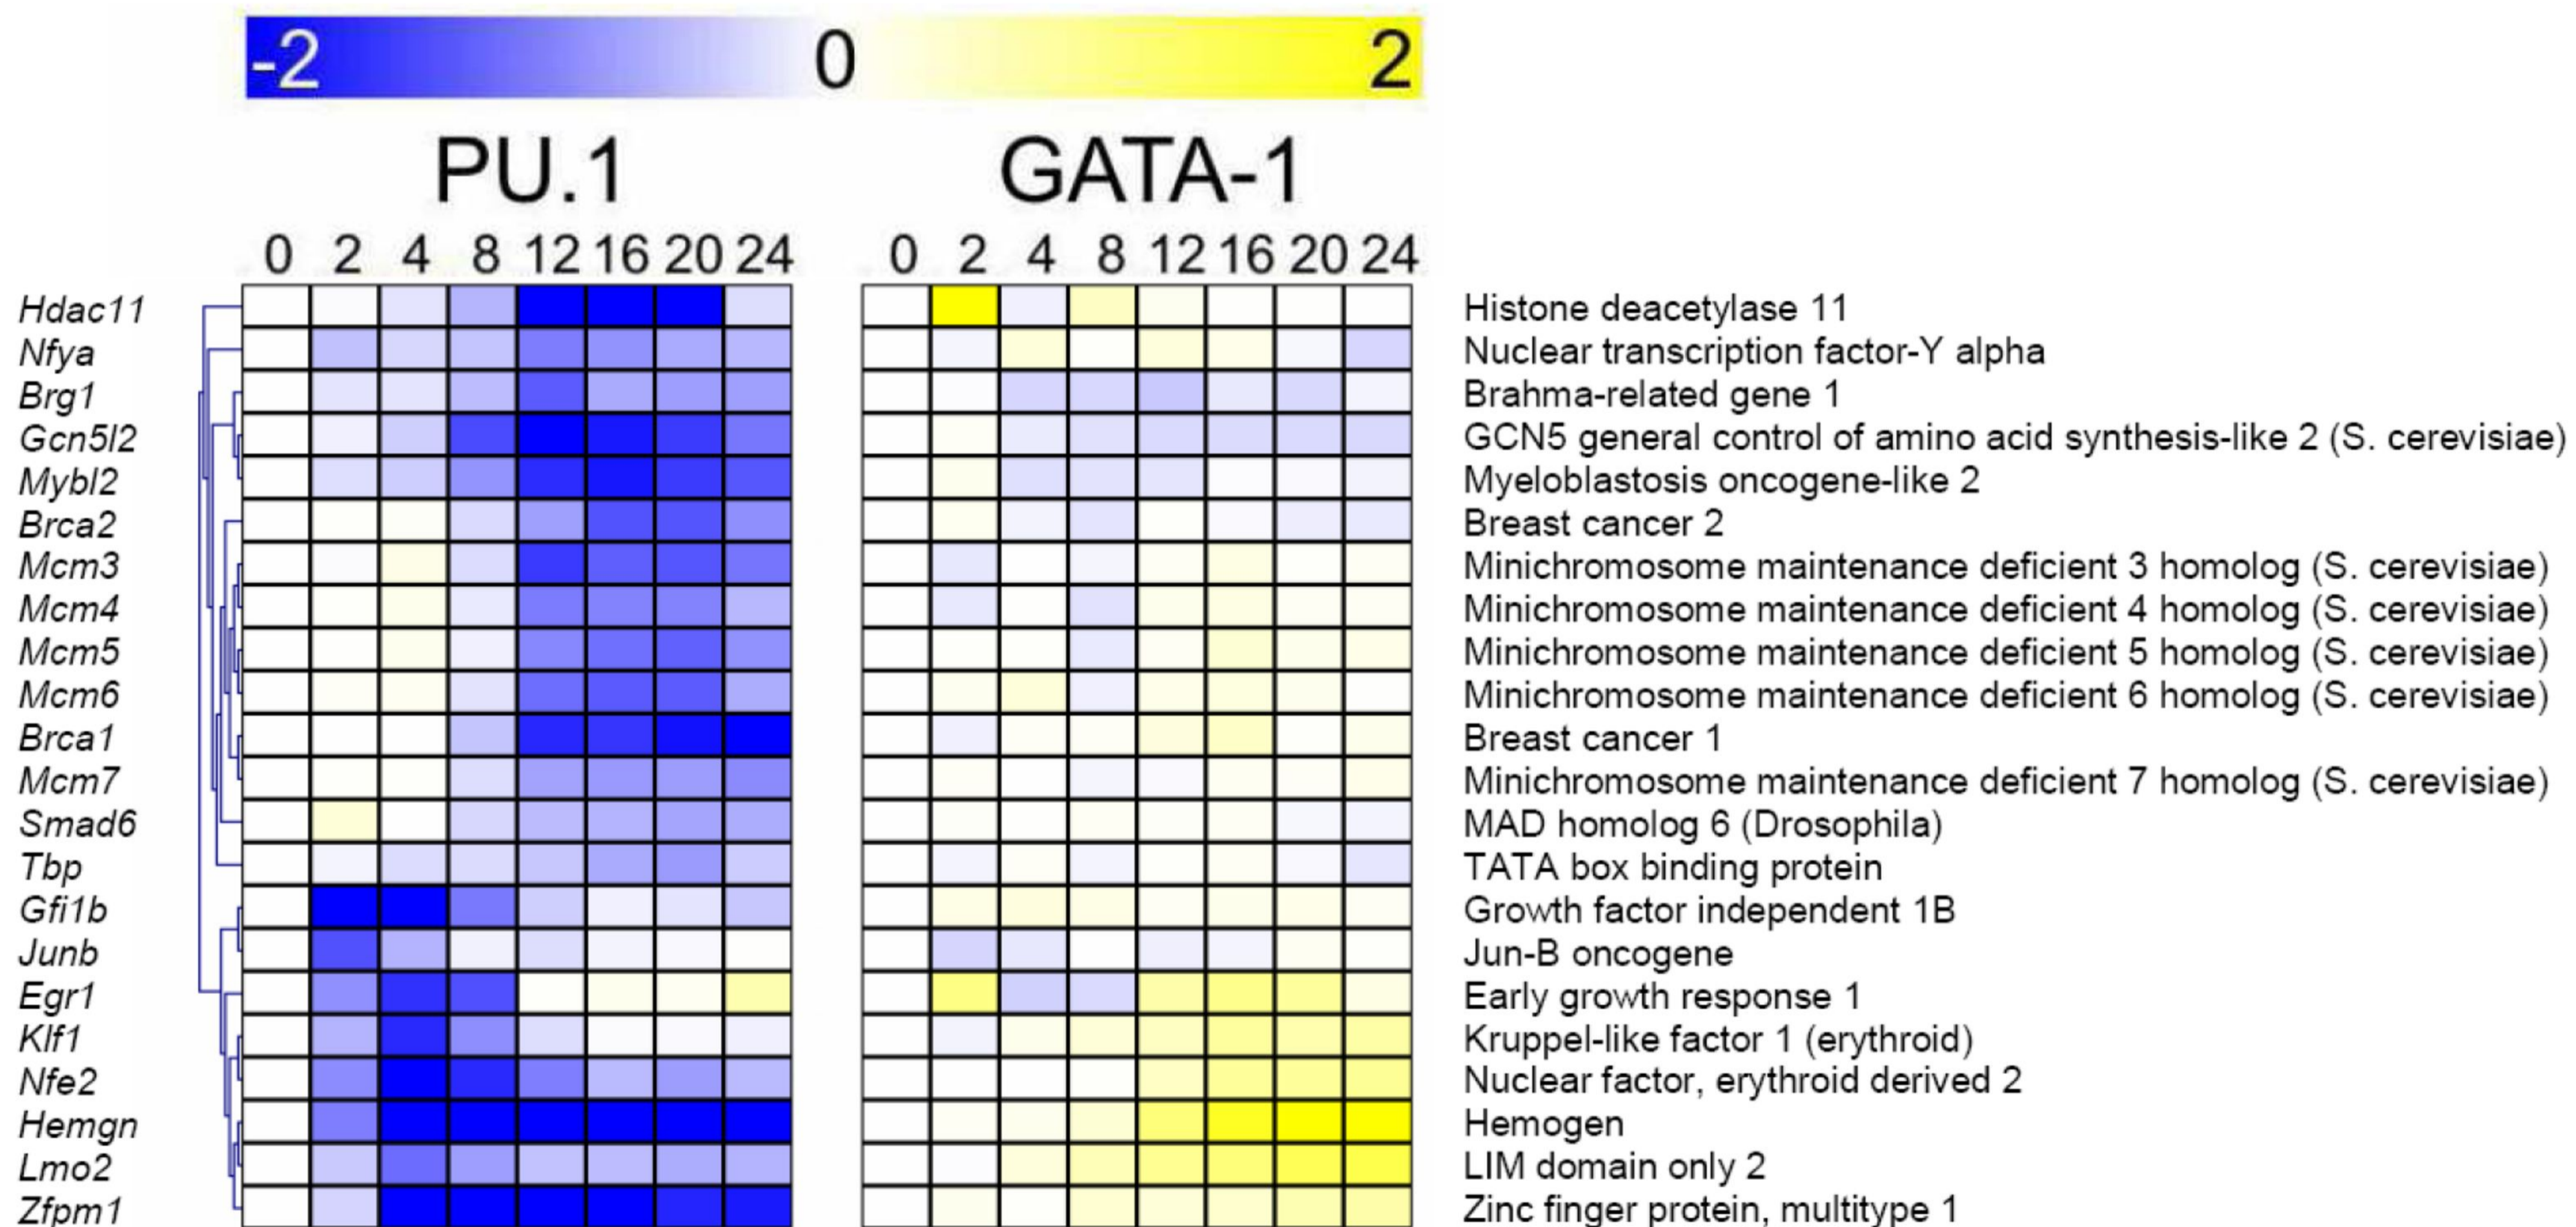

# D: Cell surface receptors and signal transduction proteins

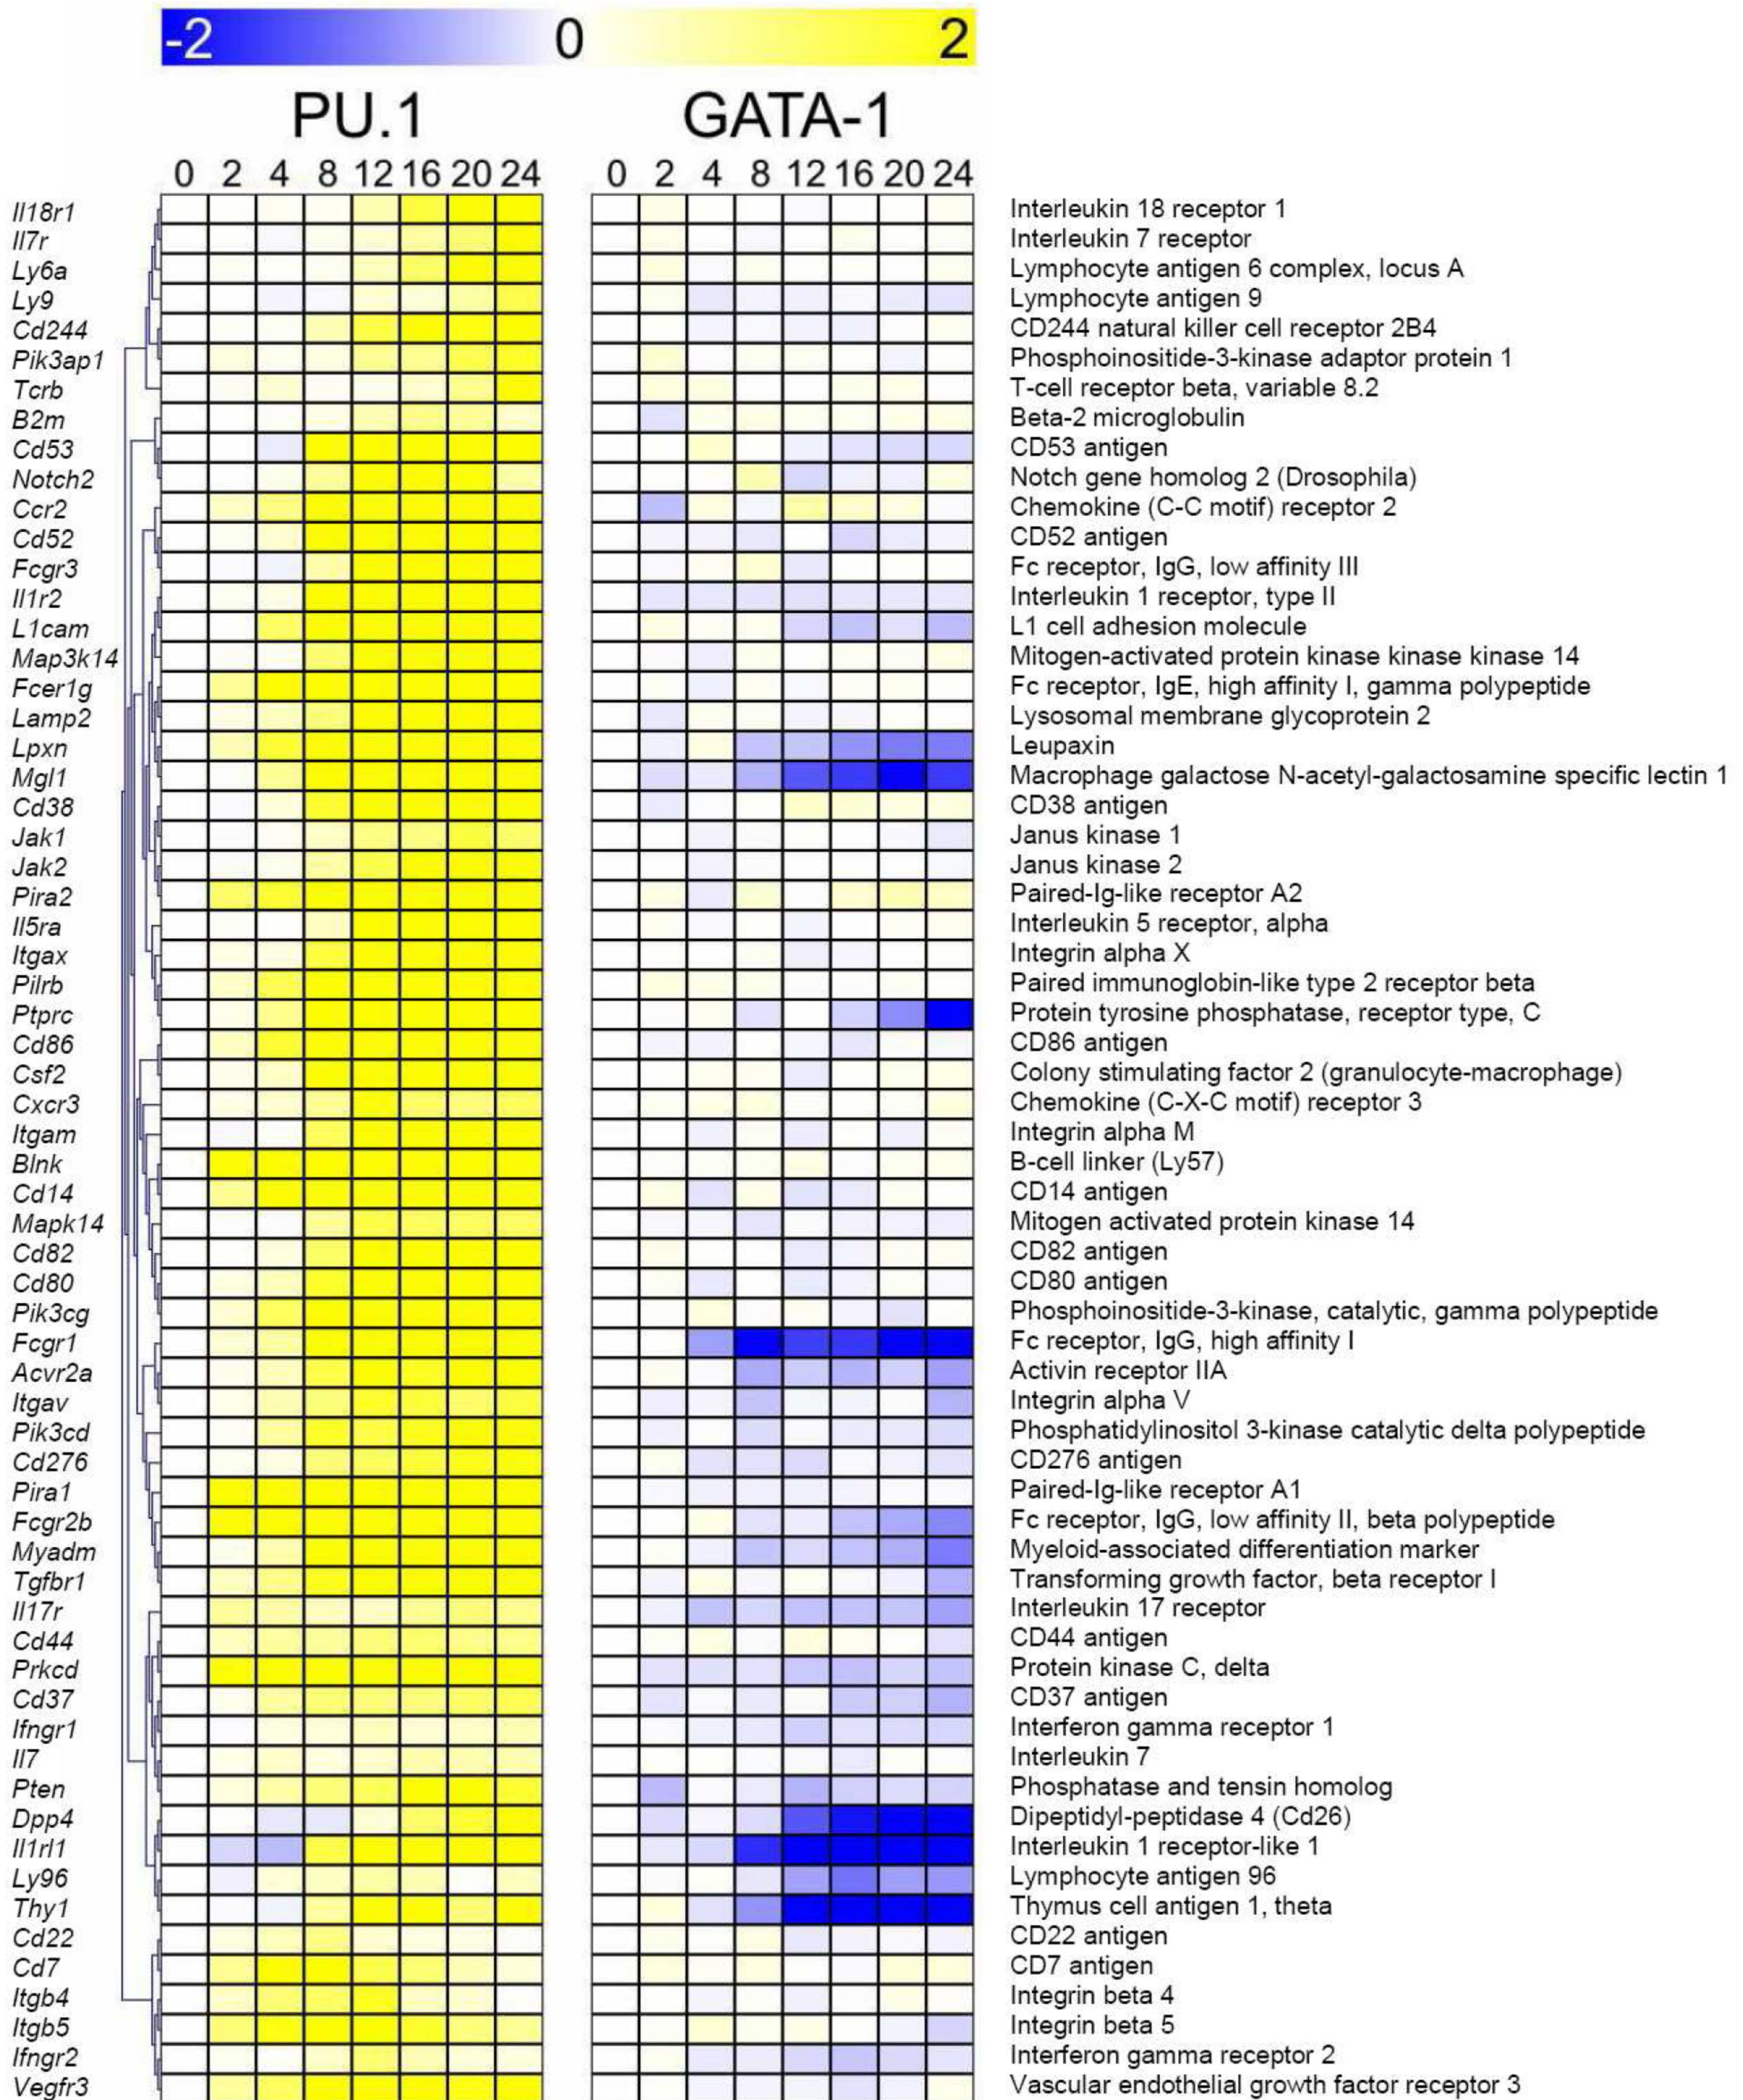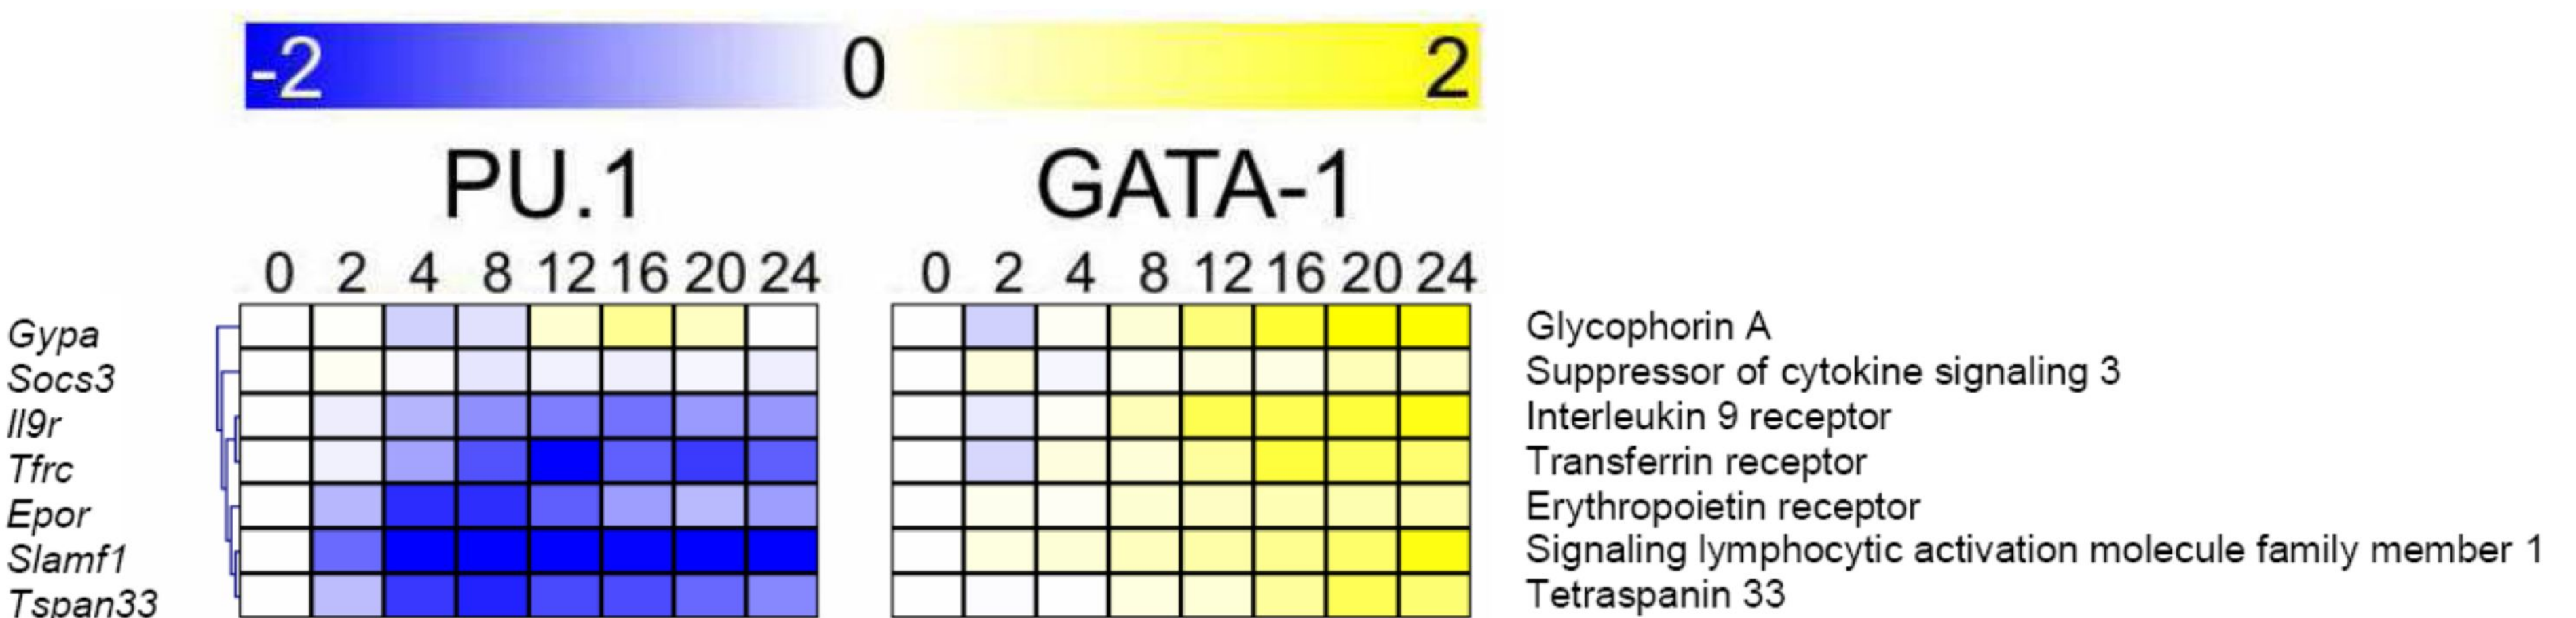

# E: Celular metabolism

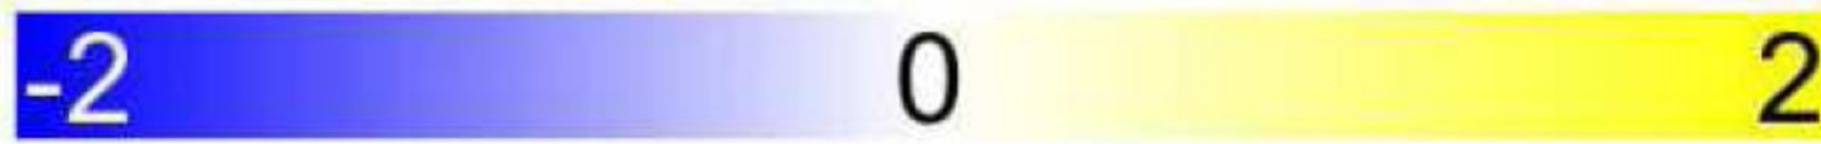

PU.1

GATA-1

0 2 4 8 12 16 20 24

0 2 4 8 12 16 20 24

*Ctsj*  
*Ncf1*  
*Hfe*  
*Mmp9*  
*Mpo*  
*Ctsb*  
*Myo1g*  
*Cat*  
*Hexb*  
*Lyzs*  
*Lzp-s*  
*Man2b1*  
*Ncf2*  
*Ncf4*

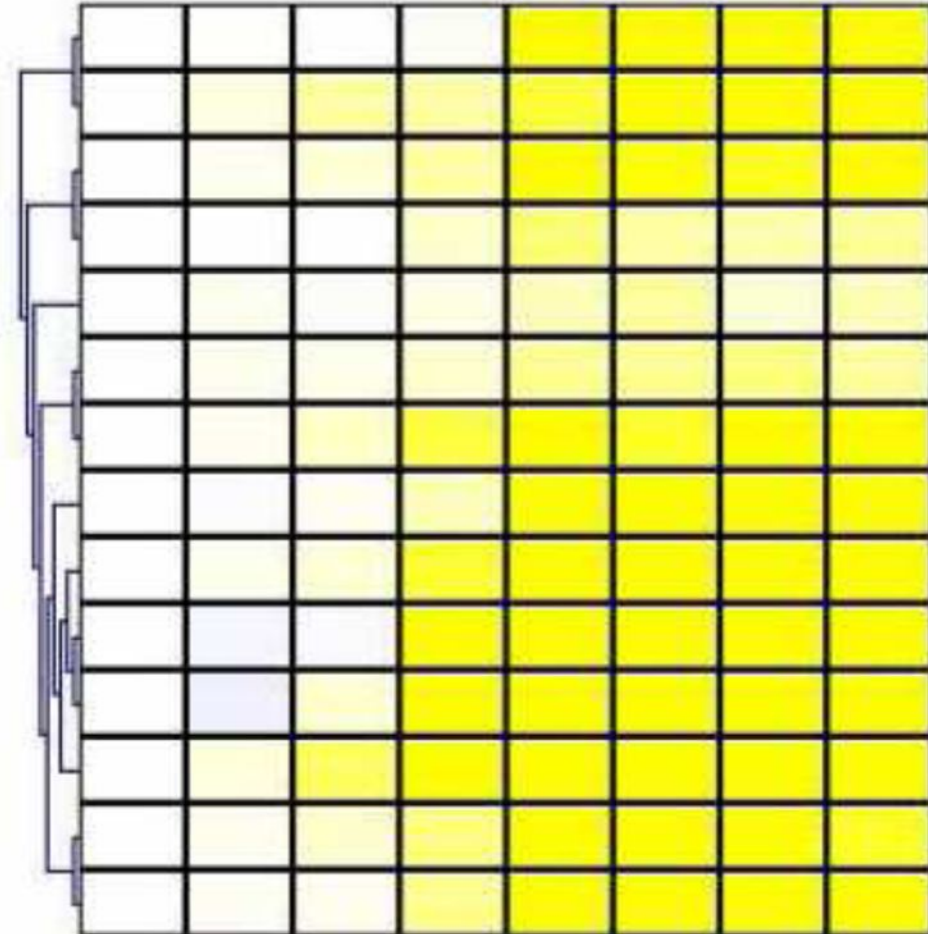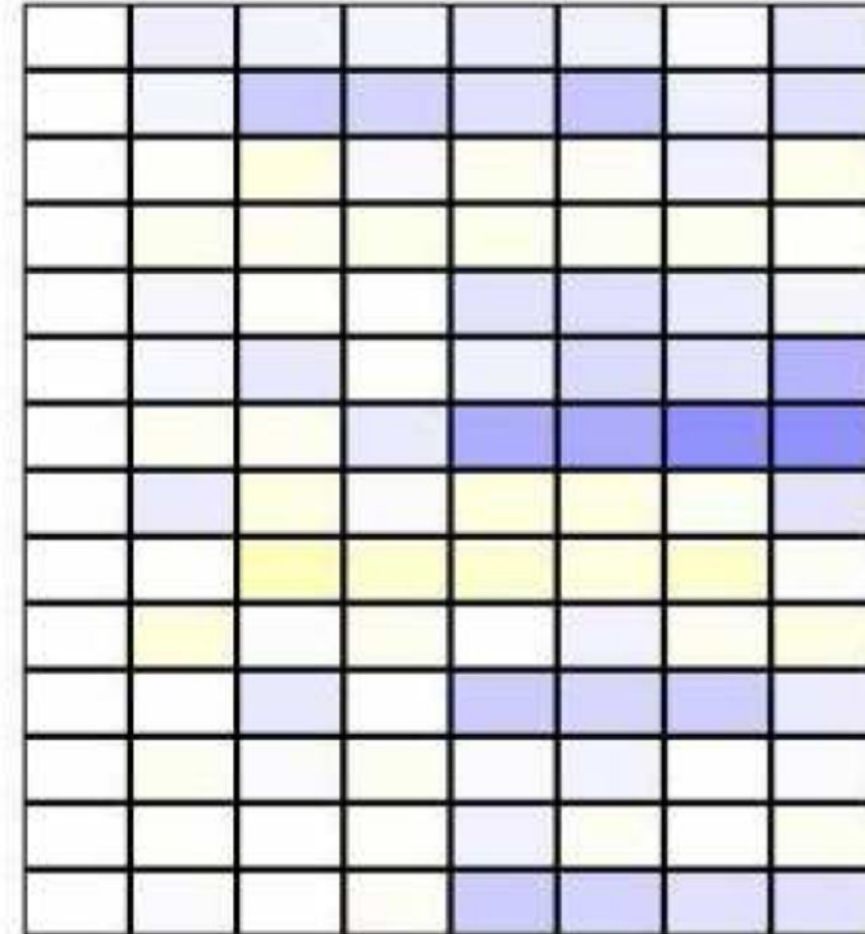

Cathepsin J  
Neutrophil cytosolic factor 1  
Hemochromatosis  
Matrix metalloproteinase 9  
Myeloperoxidase  
Cathepsin B  
Myosin IG  
Catalase  
Hexosaminidase B  
Lysozyme  
P lysozyme structural  
Mannosidase 2, alpha B1  
Neutrophil cytosolic factor 2  
Neutrophil cytosolic factor 4

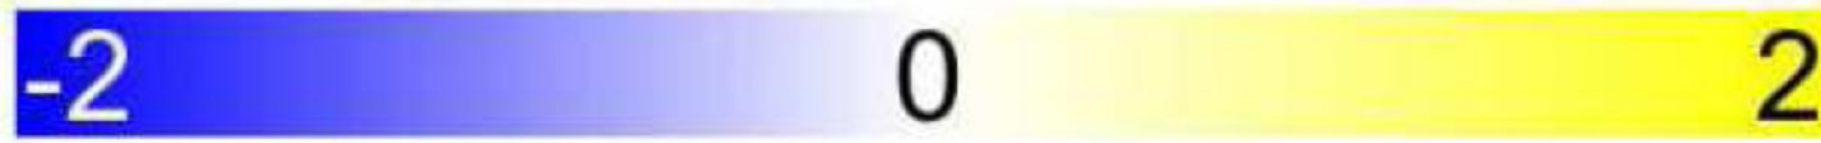

PU.1

GATA-1

0 2 4 8 12 16 20 24

0 2 4 8 12 16 20 24

*Eraf*  
*Hba-a1*  
*Alas2*  
*Hbb-b1*  
*Hk1*  
*Hk2*

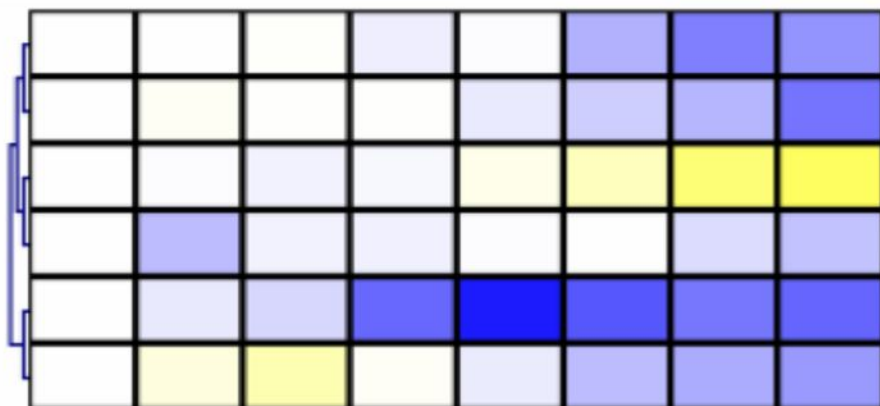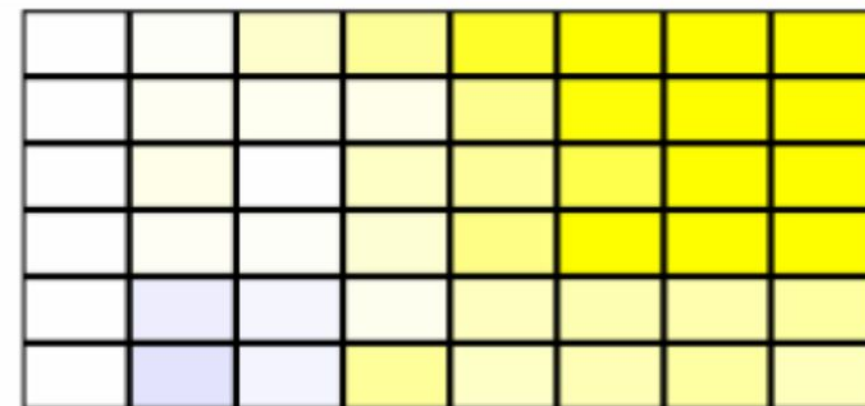

Erythroid associated factor  
Hemoglobin alpha, adult chain 1  
Aminolevulinic acid synthase 2, erythroid  
Hemoglobin, beta adult major chain  
Hexokinase 1  
Hexokinase 2

# F: Cell cycle regulatory proteins

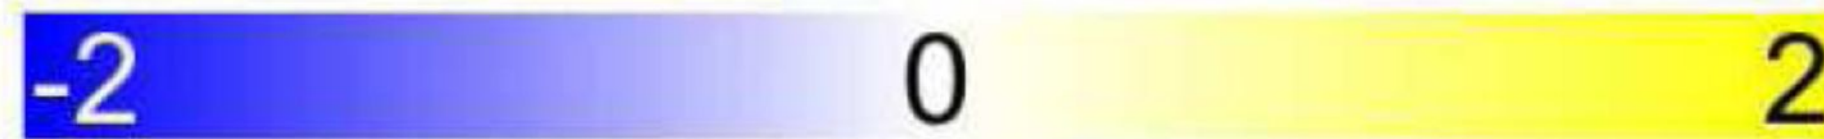

PU.1

GATA-1

0 2 4 8 12 16 20 24

0 2 4 8 12 16 20 24

*Cdkn2a*  
*Cdkn1b*  
*Cdkn2c*  
*Cdkn2b*  
*Pink1*  
*Btg1*  
*Pak1*  
*Srgap3*

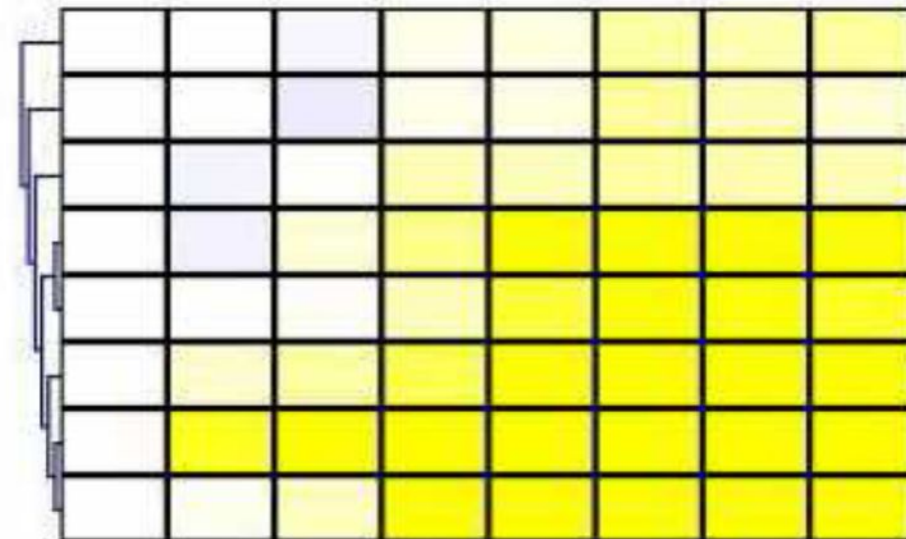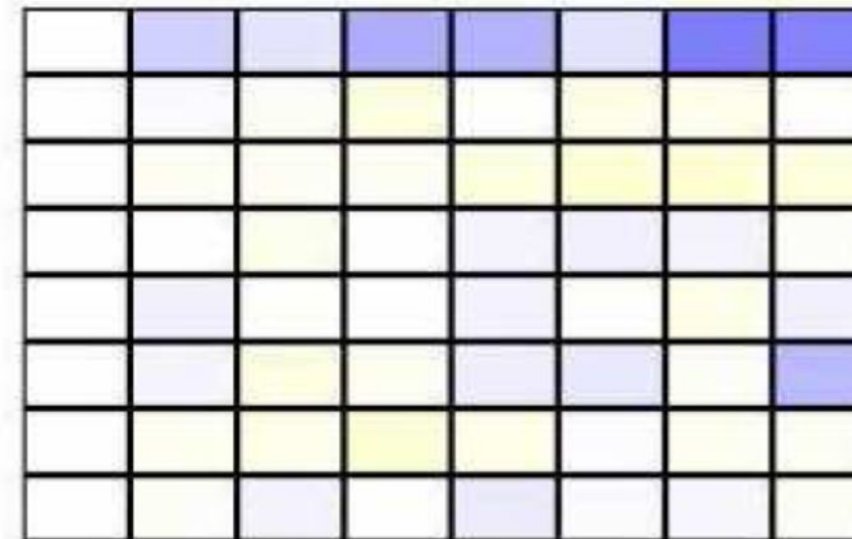

Cyclin-dependent kinase inhibitor 2A (p16)  
Cyclin-dependent kinase inhibitor 1B (p27)  
Cyclin-dependent kinase inhibitor 2C (p18)  
Cyclin-dependent kinase inhibitor 2B (p15)  
PTEN induced putative kinase 1  
B-cell translocation gene 1, anti-proliferative  
p21 (CDKN1A)-activated kinase 1  
SLIT-ROBO Rho gtpase activating protein 3

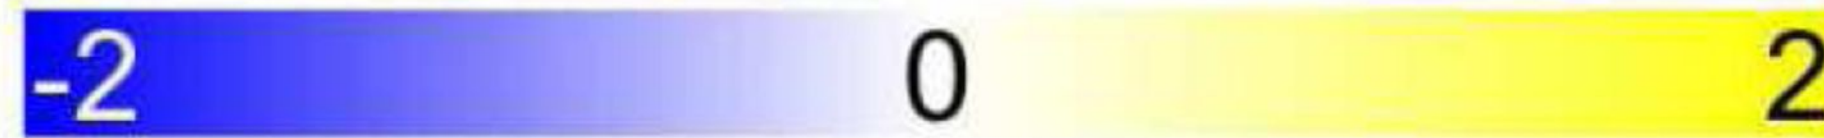

PU.1

GATA-1

0 2 4 8 12 16 20 24

0 2 4 8 12 16 20 24

*Cdc25a*  
*Ccne2*  
*Cdc25b*  
*Cdc6*  
*Cdkn1a*  
*Cdkn2d*

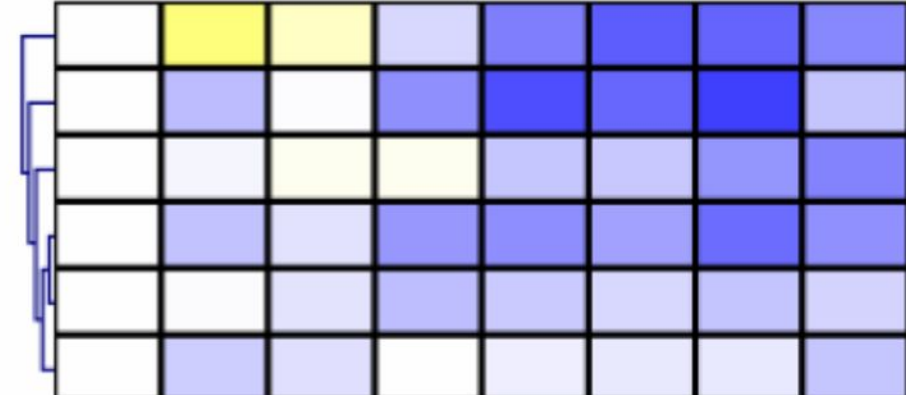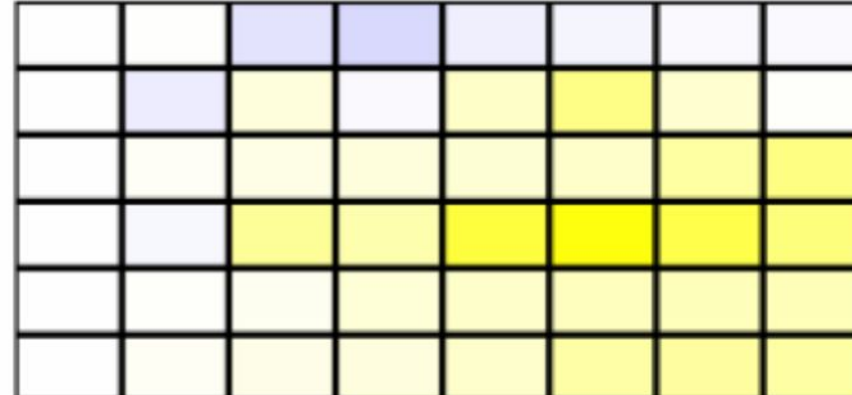

Cell division cycle 25 homolog A (*S. cerevisiae*)  
Cyclin E2  
Cell division cycle 25 homolog B (*S. cerevisiae*)  
Cell division cycle 6 homolog (*S. cerevisiae*)  
Cyclin-dependent kinase inhibitor 1A (p21)  
Cyclin-dependent kinase inhibitor 2D (p19)

# G: Apoptosis regulatory proteins

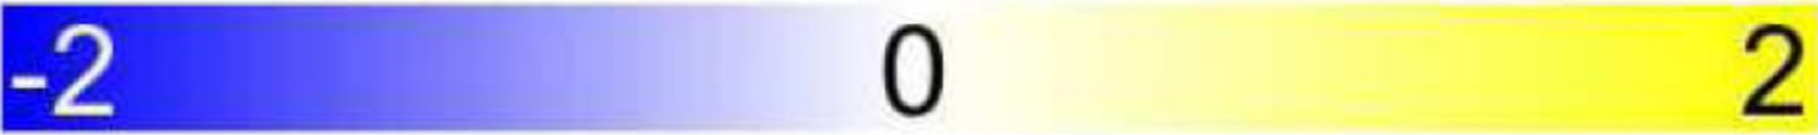

PU.1

GATA-1

0 2 4 8 12 16 20 24

0 2 4 8 12 16 20 24

*Bcl2a1*  
*Birc1e*  
*Birc4*  
*Birc1b*  
*Cflar*  
*Birc3*  
*Mcl1*

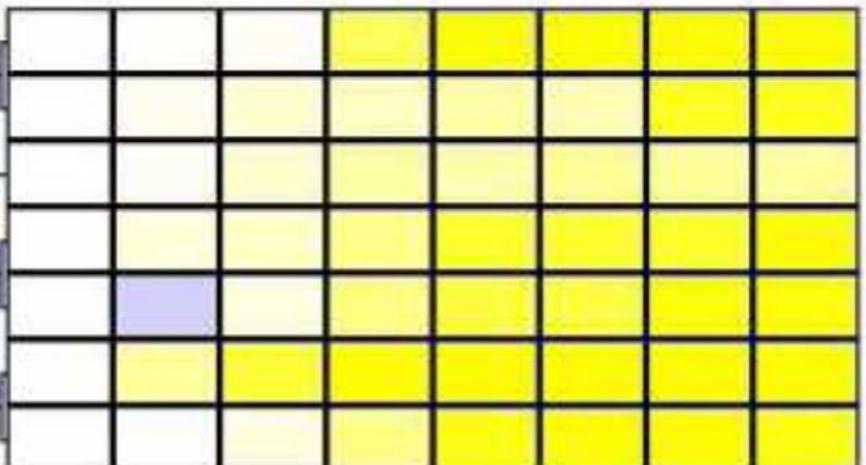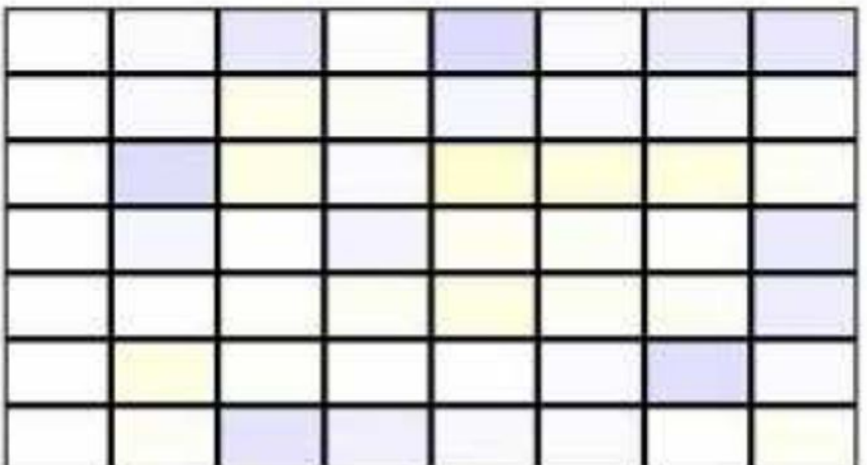

B-cell leukemia/lymphoma 2 related protein A1  
Baculoviral IAP repeat-containing 1e  
Baculoviral IAP repeat-containing 4  
Baculoviral IAP repeat-containing 1b  
CASP8 and FADD-like apoptosis regulator (Flip)  
Baculoviral IAP repeat-containing 3  
Myeloid cell leukemia sequence 1

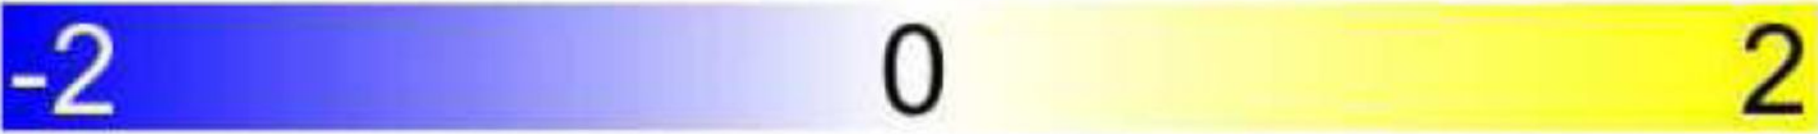

PU.1

GATA-1

0 2 4 8 12 16 20 24

0 2 4 8 12 16 20 24

*Bcl2*  
*Birc5*

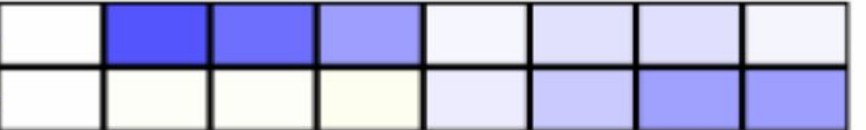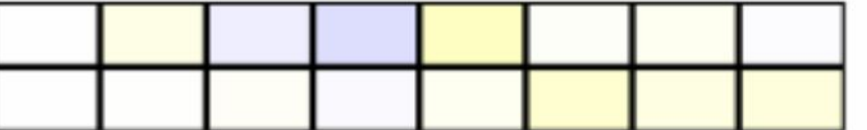

B-cell leukemia/lymphoma 2  
Baculoviral IAP repeat-containing 5



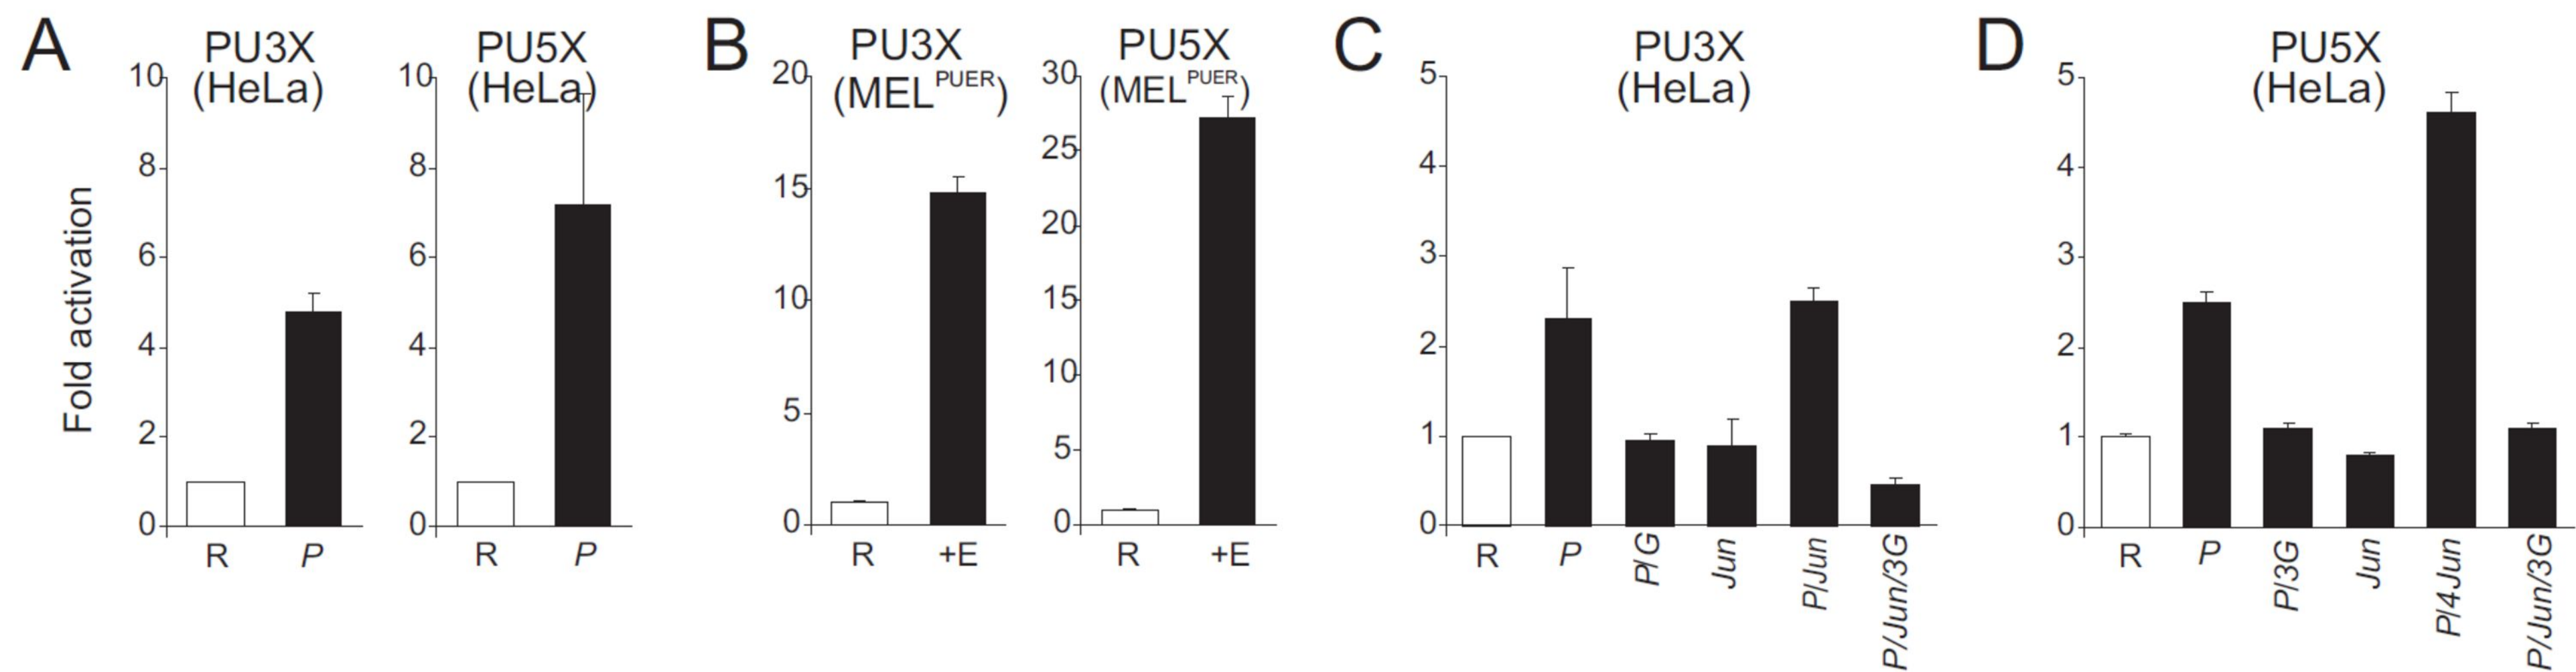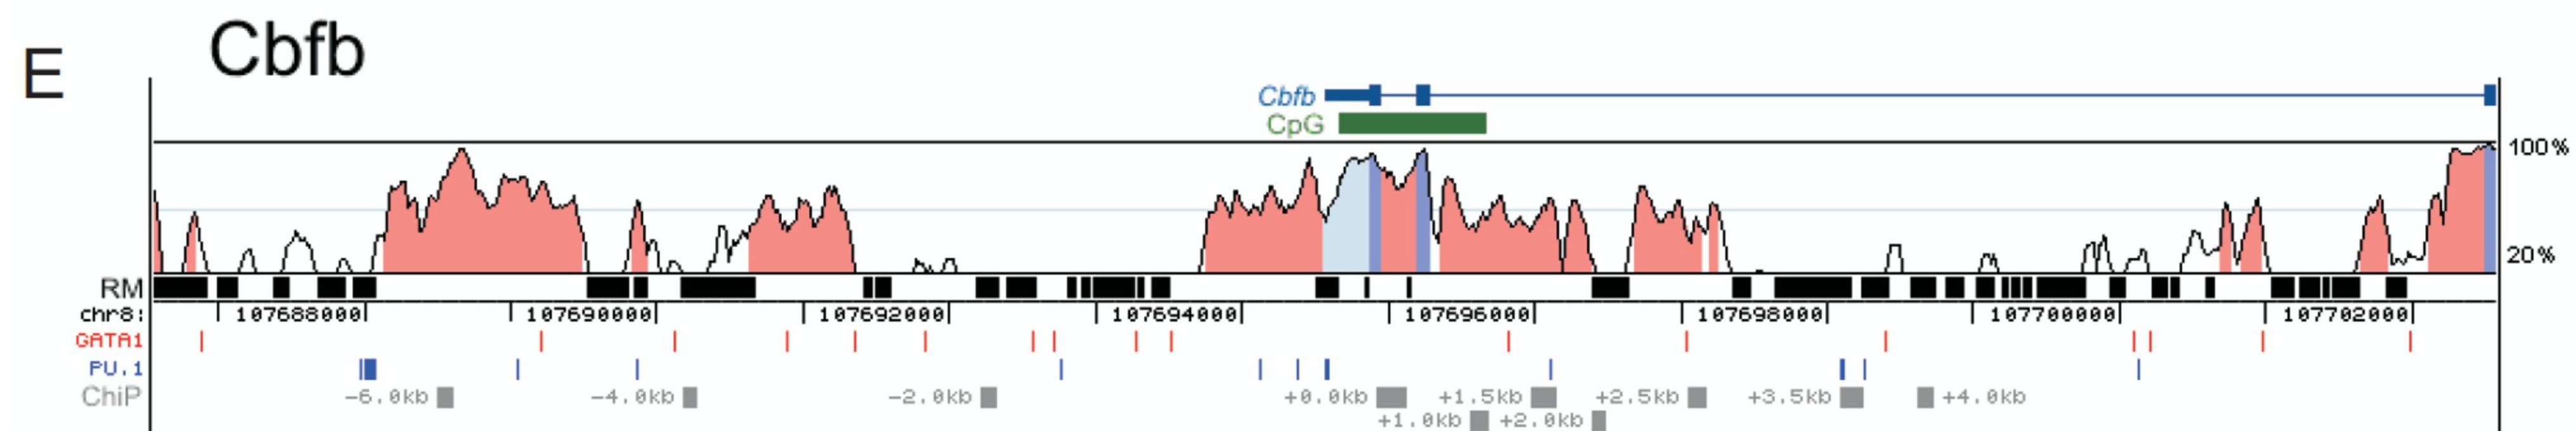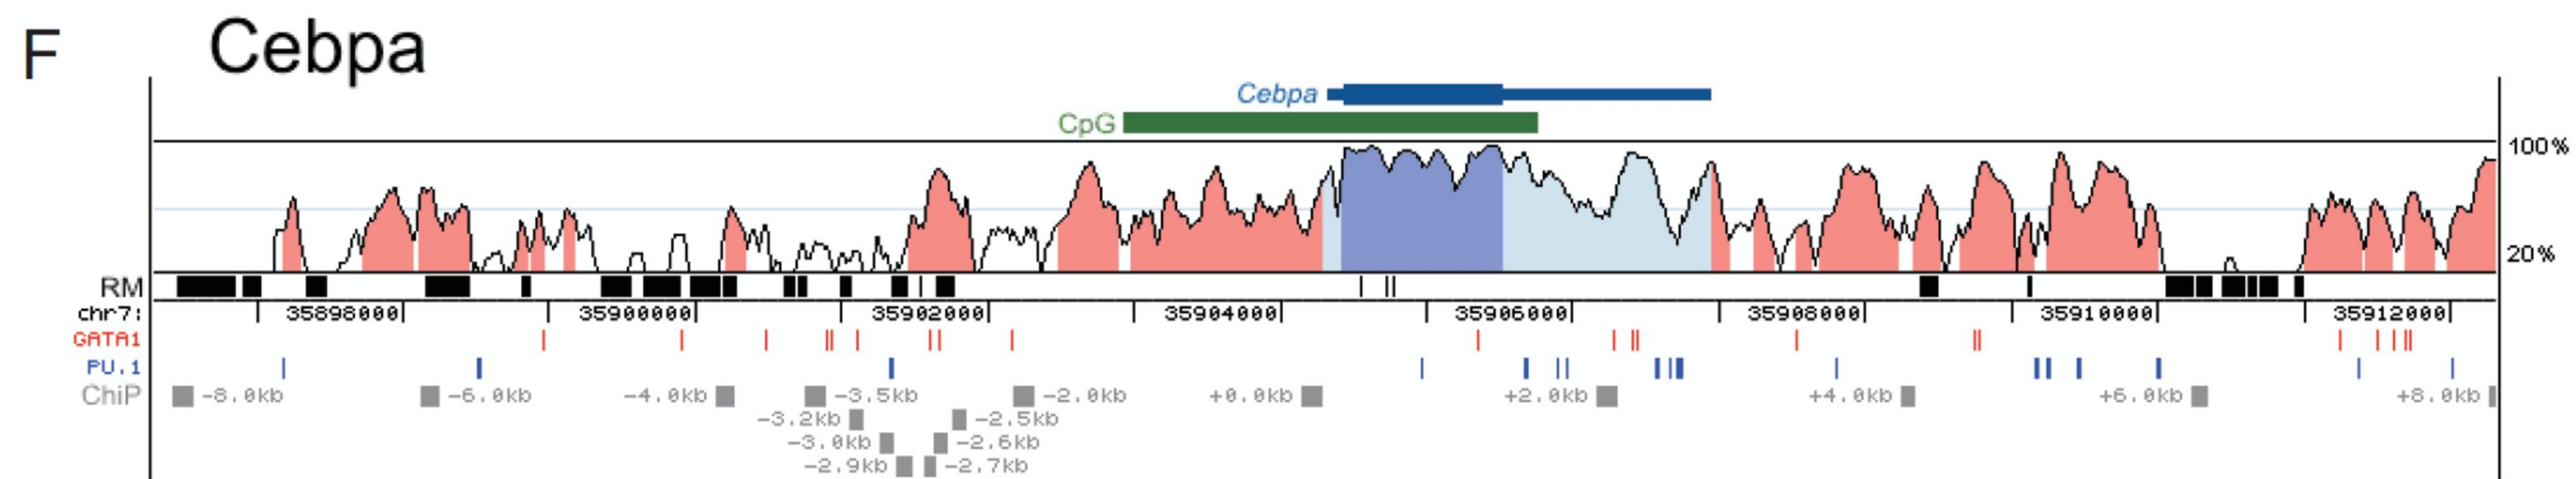

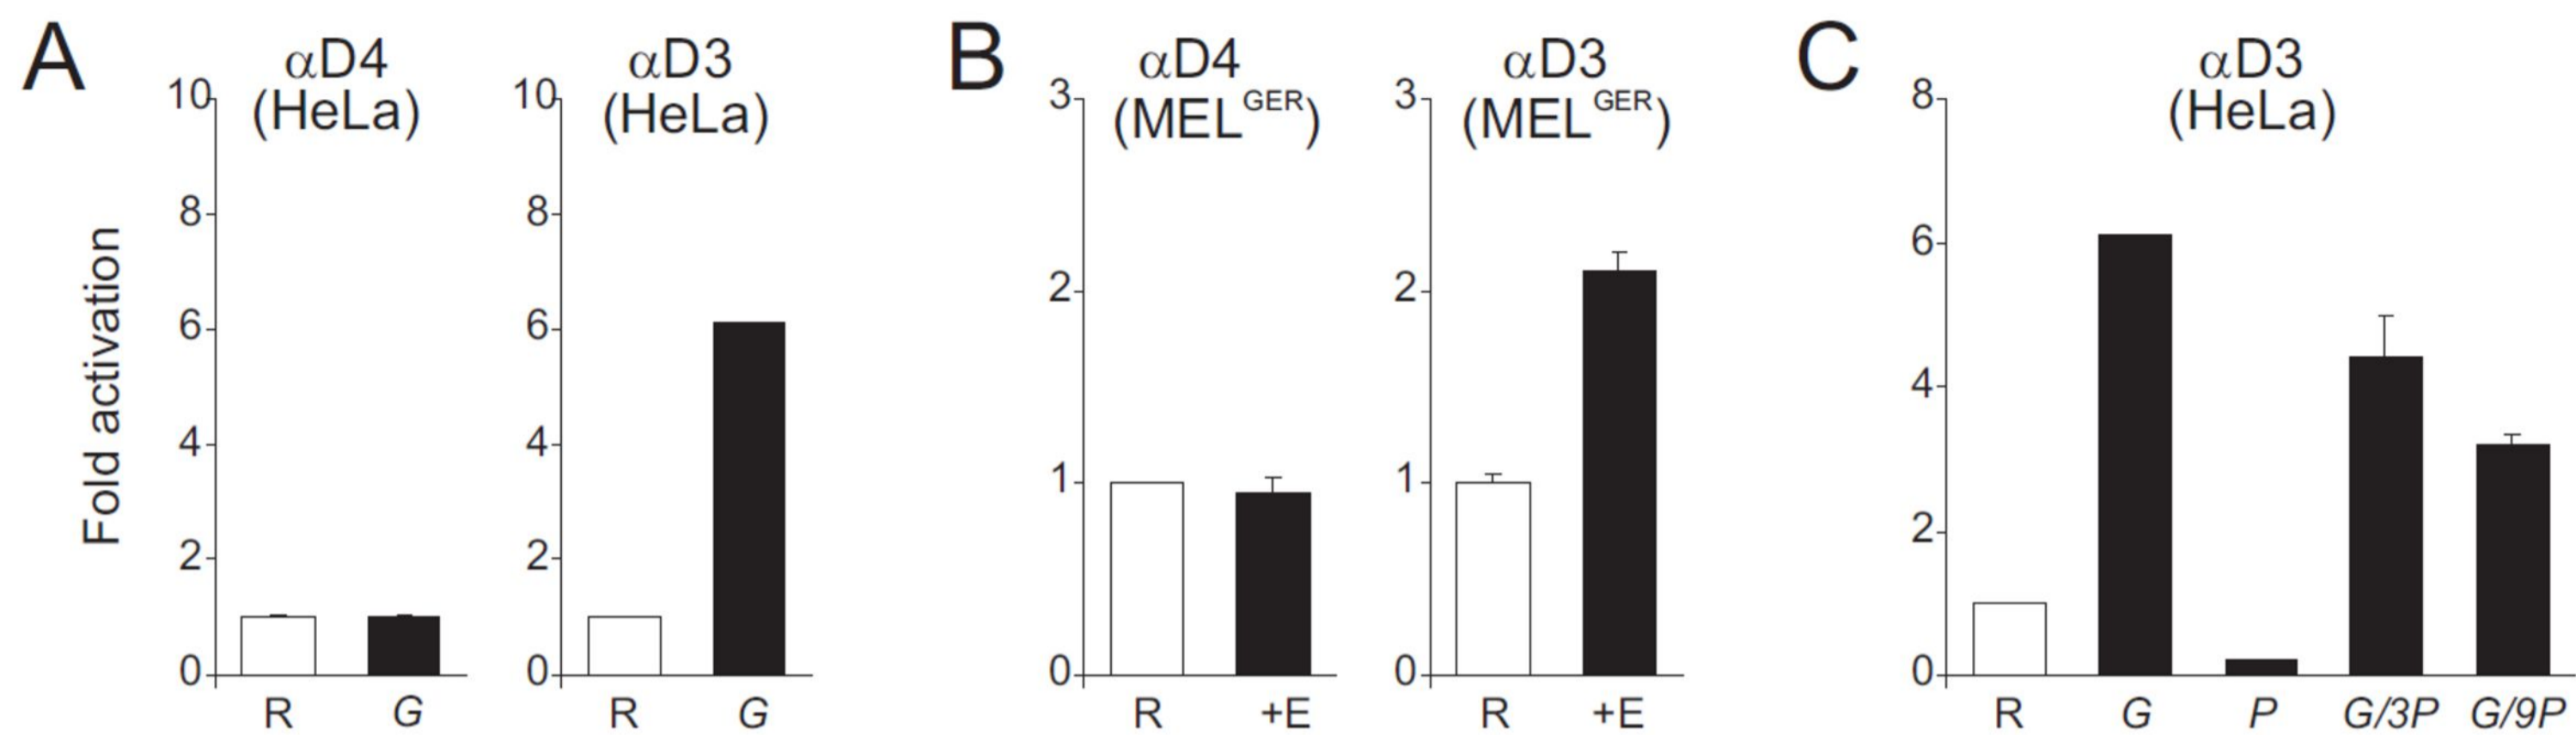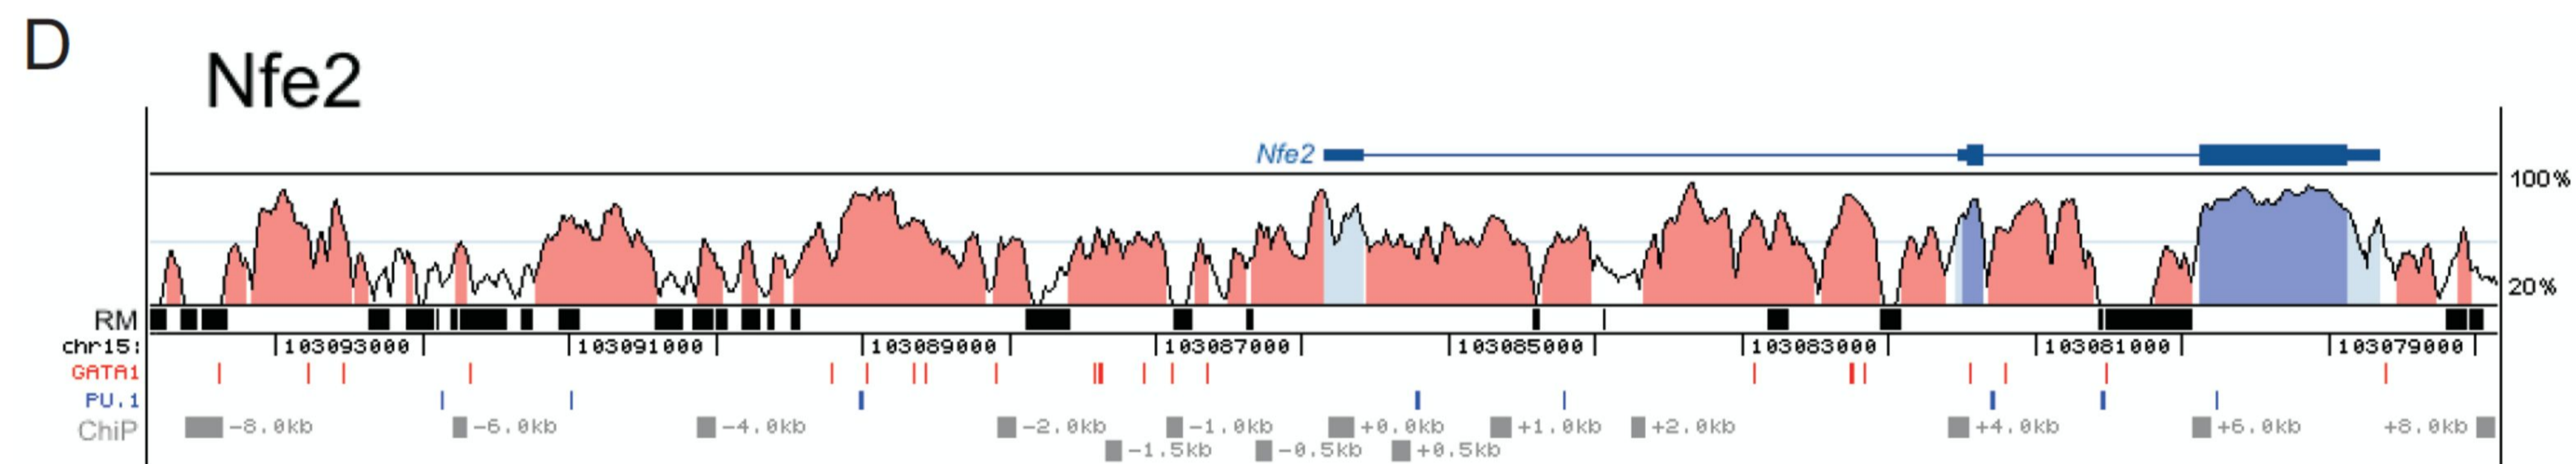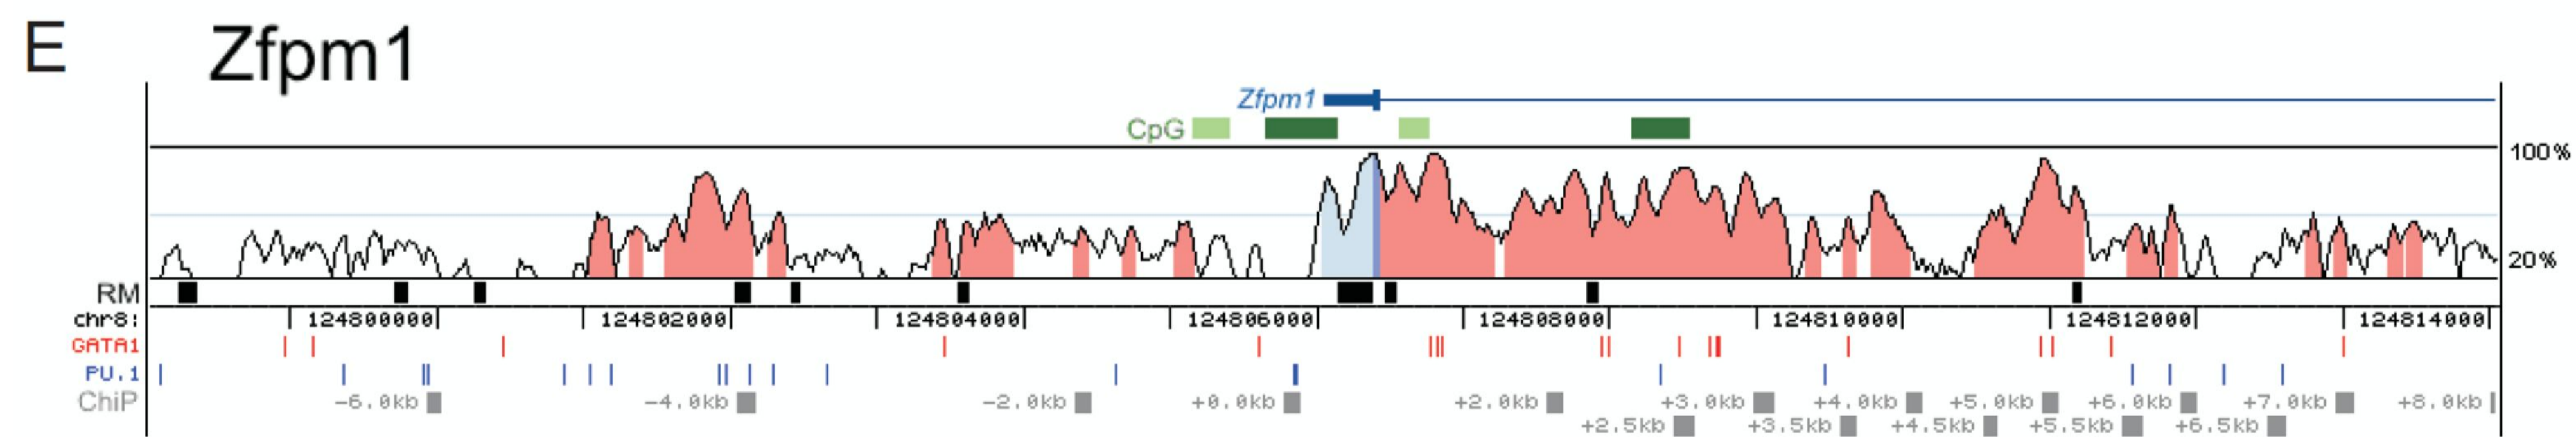

Table 1

| Gene name    | Amplicon<br>(+/- bp relative to TSS)                                      | Binding site<br>(+/- bp relative to TSS)                                         |
|--------------|---------------------------------------------------------------------------|----------------------------------------------------------------------------------|
| <i>Zfpml</i> | 3537 — 3630                                                               | +3579, AGATAA                                                                    |
| <i>Nfe2</i>  | -2233 — -2111<br>-1502 — -1390<br>-1084 — -966<br>-475 — -359<br>22 — 194 | -1589, AGATAA<br>-1532, AGATAG<br>-1525, AGATAA<br>-1052, AGATAG<br>-804, AGATAG |
| <i>Cbfb</i>  | 1812 — 1913                                                               | +1531, GAGGAACT                                                                  |
| <i>Cebpa</i> | -3260 — -3170                                                             | -2978, GAGGAAGT                                                                  |

Table 2

| Gene         | Oligo sequence                                                                                                                                                                                                                                                      | Relative position from TSS                                                                                                                                      |
|--------------|---------------------------------------------------------------------------------------------------------------------------------------------------------------------------------------------------------------------------------------------------------------------|-----------------------------------------------------------------------------------------------------------------------------------------------------------------|
| <i>Zfpml</i> | CTCTTTGAAATAAGATCAGCTGAGATAAGCATTCCGGGCTACAGGAAGCC<br>GAGAACTTTATTCTAGTCGACTCTATTTCGTAAGGCCCGATGTCCTTCGG                                                                                                                                                            | +3557 to +3606                                                                                                                                                  |
| <i>Nfe2</i>  | TGAAATTATCTGTAATCTGATATTATGTTACTATCTCTTATCTCCTATTCTGCCATCTTATT<br>ACTTAATAGACATTAGACTATAATAACAATGATAGAGAATAGAGGATAAGACGGATAGAATAA<br><br>ATTGATACGGCGTTAGATAGACCGTCTGATACAGAAAAGGATACCTCCTCAGATACCTG<br>TAACTATGCCGCAATCTATCTGGCAGACTATGTCTTTTCTTATGGAGGAGTCTATGGAC | Three segments: -1583 to -1559, -1537 to -1515 and -1055 to -1042<br><br>Five segments: -828 to -818, -807 to -796, -687 to -676, -428 to -417 and -327 to -316 |
| <i>Cbfb</i>  | TTGAAAAATATCGAAGTGATCTAGTTCCTCTCTTGCCTCTTCGTTATCCTC<br>AACTTTTTTATAGCTTCACTAGATCAAGGAGAGAACGGAGAAGCAATAGGAG                                                                                                                                                         | +1509 to +1559                                                                                                                                                  |
| <i>Cebpa</i> | CCTCTGTAGCCGCTCCTGGAAAGAGGAAGTGGGGTTGAAACAAGTCCTTTTG<br>GGAGACATCGGCGAGGACCTTCTCCTTCACCCCAACTTTGTTTCAGGAAAAC                                                                                                                                                        | -2999 to -2949                                                                                                                                                  |
